# Supplementary material
Source: MDPI journal article supplement (https://www.mdpi.com/1996-1073/9/9/669)

## Supplemental Material

Table S1: Nomenclature used in the manuscript

| Abbreviation         | Description                                              | Units                                |
|----------------------|----------------------------------------------------------|--------------------------------------|
| $\dot{E}$            | Exergy in thermal heat entering a subsystem (+)          | MW                                   |
| $\hat{e}$            | Molar flow exergy                                        | J·mol <sup>-1</sup>                  |
| $\hat{h}$            | Molar enthalpy                                           | J·mol <sup>-1</sup>                  |
| $\dot{n}$            | Molar flow rate                                          | mol·s <sup>-1</sup>                  |
| p                    | Pressure                                                 | MPa                                  |
| $\dot{\phi}_{des}$   | Rate of exergy destruction                               | MW                                   |
| $\dot{Q}$            | Heat leaving a subsystem (+)                             | MW                                   |
| $\hat{s}$            | Molar entropy                                            | J·mol <sup>-1</sup> ·K <sup>-1</sup> |
| $\dot{\sigma}_{irr}$ | Rate of entropy production due to irreversible processes | MW·K <sup>-1</sup>                   |
| T <sub>env</sub>     | Temperature of the reference environment                 | K                                    |
| $\dot{W}$            | Work leaving a subsystem (+)                             | MW                                   |

### Overall

Table S2 details the inlet and outlet streams from plant, which are the same for all three plants modeled here. The names of these streams are from the NETL Baseline Model AspenPlus files, which are included as Supplemental materials.

Table S2: Inlet and outlet streams of the overall IGCC process. The names are from NETL Baseline Model in AspenPlus.

| Inlet                |           |                 | Outlet                |                 |                     |
|----------------------|-----------|-----------------|-----------------------|-----------------|---------------------|
| Original Stream Name | Subsystem | New Stream Name | Stream Name           | Subsystem       | New Stream Name(s)  |
| Coal                 | Gasifier  | S1              | Slag                  | Gasifier        | S2                  |
| 20 (GT)              | GT        | A2              | CO <sub>2</sub> -Prod | CO <sub>2</sub> | C3                  |
| Air1                 | ASU       | A1              | S-out                 | Claus           | L12                 |
| Water2               | Selexol   | L6              | Stack                 | Steam           | F8                  |
| Makeup-w             | Steam     | L9              | Knockout              | various         | G3, G4, L7, L8, L10 |
| Makeupw              | Claus     | L11             |                       |                 |                     |

The Knockout exiting the plant consists of all of the knockout, waste, and vent streams exiting the overall plant. All three models analyzed here have the same inlet and outlet streams.

### Modifications

A few modifications were made during the analysis of both plants, but kept constant between the all models. For example, we added pumps and heat exchangers to that the slurry leaving the Claus system was recycled, mixed with makeup water, and split into three streams that became make-up streams elsewhere in the power plant. These make-up streams were (a) the slurry water from the Gasifier

subsystem, (b) the sump water from the Gasifier subsystem, and (c) the scrub water from the Scrubber subsystem. The energy associated with heating and compressing these streams to the appropriate temperatures and pressure was fully taken into account in our analysis. Design specs were implemented in the AspenPlus flowsheet to ensure the streams would be as identical as possible in temperature, pressure, and flowrates for consistency between the subsystems and exergy analyses. The stream “TO-SHIFT” is recycled from the Steam cycle and used as the steam for the WGS reaction; a heater was added in the Steam cycle in order to make the two streams have identical temperature and pressure.

In addition, in order to make the process flow diagram more readable, all streams that flow in between subsystems were renamed based on categories listed in Table S3. This naming structure was used to rename the streams in all three models analyzed. All streams that had a flowrate of zero were excluded in the renaming. The following sections provide more detail on the models that could not be included in the paper due to space restrictions.

Table S3: Categories and their respective label for renamed streams

| Category       |  | Label |
|----------------|--|-------|
| Air            |  | A     |
| Carbon Dioxide |  | C     |
| Fuel           |  | F     |
| Gas            |  | G     |
| Liquid         |  | L     |
| Nitrogen       |  | N     |
| Oxygen         |  | O     |
| Solid          |  | S     |

The air, oxygen and solid streams are identical in all of the models. They are described below in Table S4, Table S5, and Table S6, respectively. They give a comprehensive breakdown of the streams that remain the same in all cases. Table S6 includes the components modeled in the coal and slag.

Table S4: Breakdown of air streams for all three models

|                                                | <b>A1</b>        | <b>A2</b>                               |
|------------------------------------------------|------------------|-----------------------------------------|
| Description                                    | Air entering ASU | Air entering as diluent in GT subsystem |
| Temperature [K]                                | 288              | 288                                     |
| Pressure [MPa]                                 | 0.101            | 0.101                                   |
| Flowrate [ $\text{kmol} \cdot \text{s}^{-1}$ ] | 7.99             | 30.74                                   |
| Enthalpy [MW]                                  | -24.21           | -93.15                                  |
| Entropy [ $\text{kW} \cdot \text{K}^{-1}$ ]    | 29.30            | 112.73                                  |
| Exergy [MW]                                    | 0.18             | 0.71                                    |
| Composition [mol%]                             |                  |                                         |
| CO <sub>2</sub>                                | 0.03             | 0.03                                    |
| H <sub>2</sub> O                               | 1.08             | 1.08                                    |
| N <sub>2</sub>                                 | 77.19            | 77.19                                   |
| Ar                                             | 0.94             | 0.94                                    |
| O <sub>2</sub>                                 | 20.76            | 20.76                                   |

Table S5: Breakdown of oxygen streams for all three models

|                                  | <b>O1</b>               | <b>O2</b>            |
|----------------------------------|-------------------------|----------------------|
| Description                      | Oxygen sent to Gasifier | Oxygen sent to Claus |
| Temperature [K]                  | 363.90                  | 505.22               |
| Pressure [MPa]                   | 6.76                    | 1.00                 |
| Flowrate [kmol·s <sup>-1</sup> ] | 1.62                    | 0.03                 |
| Enthalpy [MW]                    | 2.47                    | 0.17                 |
| Entropy [kW·K <sup>-1</sup> ]    | -45.46                  | -0.04                |
| Exergy [MW]                      | 22.79                   | 0.29                 |
| Composition [mol%]               |                         |                      |
| N <sub>2</sub>                   | 1.88                    | 1.88                 |
| Ar                               | 3.22                    | 3.22                 |
| O <sub>2</sub>                   | 94.90                   | 94.90                |

Table S6: Breakdown of solid streams for all three models

|                                | <b>S1</b>  | <b>S2</b>    |
|--------------------------------|------------|--------------|
| Description                    | Inlet coal | Exiting slag |
| Temperature [K]                | 333        | 489.10       |
| Pressure [MPa]                 | 7.24       | 5.5          |
| Flowrate [kg·s <sup>-1</sup> ] | 62.20      | 6.61         |
| Enthalpy [MW]                  | -119.7     | -15.0        |
| Entropy [kW·K <sup>-1</sup> ]  | -139.4     | 23.0         |
| Exergy [MW]                    | 1747.43    | 32.99        |
| Composition [wt%]              |            |              |
| C                              | 63.74      | 12.56        |
| H                              | 4.50       | 0.13         |
| O                              | 6.89       | 0.41         |
| N                              | 1.25       | 0.00         |
| S                              | 2.51       | 0.00         |
| Cl                             | 0.29       | 0.00         |
| MC (H <sub>2</sub> O)          | 11.12      | 0.00         |
| Total Ash                      | 9.70       | 86.90        |
| SiO <sub>2</sub>               | 3.18       | 29.92        |
| CaO                            | 1.56       | 14.69        |
| MgO                            | 0.16       | 1.54         |
| Al <sub>2</sub> O <sub>3</sub> | 2.58       | 24.21        |
| Na <sub>2</sub> O              | 0.32       | 2.99         |
| K <sub>2</sub> O               | 0.10       | 0.91         |
| FeO                            | 0.00       | 3.05         |
| Fe <sub>2</sub> O <sub>3</sub> | 1.80       | 0.11         |
| Fe                             | 0.00       | 9.48         |

### NETL Baseline Model

Table 5 below gives the new name used for streams in the NETL Baseline Model. It describes the subsystem and whether the stream is entering or exiting. The original stream names can be found in the included AspenPlus NETL Baseline Model.

Table S7: Renamed streams in the NETL Baseline Model following the structure presented in Table S1

| Original Stream Name | New Name | Subsystem | Destination |
|----------------------|----------|-----------|-------------|
| Coal                 | S1       | Gasifier  | In          |
| Slurry-w             | L1       | Gasifier  | In          |
| O2X                  | O1       | Gasifier  | In          |
| Sump-w               | L2       | Gasifier  | In          |
| rawgas               | F1       | Gasifier  | Out         |
| slag                 | S2       | Gasifier  | Out         |
| Rawgas2              | F1       | Scrubber  | In          |
| Scrubwat             | L3       | Scrubber  | In          |
| SG4                  | F2       | Scrubber  | Out         |
| Waste (sour1)        | L4       | Scrubber  | Out         |
| SH1                  | F2       | WGS       | In          |
| 10                   | G2       | WGS       | In          |
| SH9                  | F3       | WGS       | Out         |
| C1                   | F3       | Cool      | In          |
| C4                   | F4       | Cool      | Out         |
| Sour 1 (sour 2)      | L5       | Cool      | Out         |
| Coolsynb             | F4       | Selexol   | In          |
| Tailgasb             | F5       | Selexol   | In          |
| N2-Selex             | N1       | Selexol   | In          |
| Water2               | L6       | Selexol   | In          |
| Clnsynb              | F6       | Selexol   | Out         |
| Toclausb             | G1       | Selexol   | Out         |
| Lp-CO2               | C1       | Selexol   | Out         |
| Mp-CO2               | C2       | Selexol   | Out         |
| Lp1                  | C1       | CO2       | In          |
| Mp1                  | C2       | CO2       | In          |
| Co2-prod             | C3       | CO2       | Out         |
| Tegwater             | L7       | CO2       | Out         |
| Air1                 | A1       | ASU       | In          |
| Knockout             | L8       | ASU       | Out         |
| ASU-vent             | G3       | ASU       | Out         |
| N2Hot2               | N2       | ASU       | Out         |
| To-selex2            | N1       | ASU       | Out         |
| O2HP                 | O1       | ASU       | Out         |
| Oxy1                 | O2       | ASU       | Out         |
| GT-N2                | N2       | GTurbine  | In          |
| GT1                  | F6a      | GTurbine  | In          |
| 20                   | A2       | GTurbine  | In          |
| GT7                  | F7       | GTurbine  | Out         |
| Oxy2                 | O2       | Claus     | In          |
| Sour1                | L4       | Claus     | In          |
| Sour2                | L5       | Claus     | In          |
| Acid1                | G1       | Claus     | In          |
| Makeupw              | L11      | Claus     | In          |
| H2                   | F6b      | Claus     | In          |
| S-out                | L12      | Claus     | Out         |

|           |     |       |     |
|-----------|-----|-------|-----|
| Tail5     | F5  | Claus | Out |
| Toslurryw | L1  | Claus | Out |
| Tosump    | L2  | Claus | Out |
| Toscrub   | L3  | Claus | Out |
| Flue      | F7  | Steam | In  |
| Makeup-w  | L9  | Steam | In  |
| Newstack  | F8  | Steam | Out |
| To-shift  | G2  | Steam | Out |
| Waste     | L10 | Steam | Out |
| Ventgas   | G4  | Steam | Out |

Table S6 through Table S12 give a more in-depth description of each of the streams in the NETL Baseline Model. A description, temperature, pressure, flowrate, enthalpy, entropy, exergy, and composition is presented. The enthalpy and entropy values are from the Aspen model and the exergy values are from our calculations.

Table S8: Breakdown of the carbon dioxide streams in the NETL Baseline Model

|                                  | <b>C1</b>                                              | <b>C2</b>                                              | <b>C3</b>                                       |
|----------------------------------|--------------------------------------------------------|--------------------------------------------------------|-------------------------------------------------|
| Description                      | Low pressure CO <sub>2</sub><br>stream exiting Selexol | Mid-pressure CO <sub>2</sub><br>stream exiting Selexol | Supercritical CO <sub>2</sub><br>product stream |
| Temperature [K]                  | 284.4                                                  | 293.4                                                  | 322.8                                           |
| Pressure [MPa]                   | 0.15                                                   | 1.1                                                    | 15.3                                            |
| Flowrate [kmol·s <sup>-1</sup> ] | 1.79                                                   | 1.14                                                   | 2.93                                            |
| Enthalpy [MW]                    | -705.98                                                | -446.62                                                | -1174.01                                        |
| Entropy [kW·K <sup>-1</sup> ]    | -3.94                                                  | -20.62                                                 | -170.35                                         |
| Exergy [MW]                      | 36.41                                                  | 30.11                                                  | 87.4                                            |
| Composition [mol%]               |                                                        |                                                        |                                                 |
| CO                               | 0.00                                                   | 0.05                                                   | 0.02                                            |
| CO <sub>2</sub>                  | 99.64                                                  | 99.16                                                  | 99.63                                           |
| H <sub>2</sub>                   | 0.00                                                   | 0.54                                                   | 0.22                                            |
| H <sub>2</sub> O                 | 0.36                                                   | 0.06                                                   | 0.05                                            |
| N <sub>2</sub>                   | 0.00                                                   | 0.11                                                   | 0.05                                            |
| Ar                               | 0.00                                                   | 0.08                                                   | 0.03                                            |

Table S9: Breakdown of fuel streams in the NETL Baseline Model

|                                  | <b>F1</b>                      | <b>F2</b>                               | <b>F3</b>                | <b>F4</b>        | <b>F5</b>        | <b>F6</b>         |
|----------------------------------|--------------------------------|-----------------------------------------|--------------------------|------------------|------------------|-------------------|
| Description                      | Raw gas<br>exiting<br>Gasifier | Scrubbed gas<br>exiting the<br>Scrubber | Syngas<br>exiting<br>WGS | Cooled<br>syngas | Claus<br>Recycle | Cleaned<br>syngas |
| Temperature [K]                  | 489.10                         | 484.07                                  | 423                      | 312              | 308              | 288.03            |
| Pressure [MPa]                   | 5.5                            | 5.5                                     | 5.429                    | 5.429            | 5.35             | 5.2               |
| Flowrate [kmol·s <sup>-1</sup> ] | 9.46                           | 8.72                                    | 10.40                    | 7.78             | 0.08             | 5.15              |
| Enthalpy [MW]                    | -1507.27                       | -1329.80                                | -1912.88                 | -1247.98         | -25.57           | -100.52           |
| Entropy [kW·K <sup>-1</sup> ]    | 24.39                          | 16.31                                   | -375.46                  | -179.88          | -2.23            | -140.76           |
| Exergy [MW]                      | 1312.79                        | 1298.90                                 | 1231.9                   | 1214.56          | 4.24             | 1102.10           |
| Composition [mol%]               |                                |                                         |                          |                  |                  |                   |
| CO                               | 26.89                          | 29.19                                   | 0.82                     | 1.10             | 0.02             | 1.65              |
| CO <sub>2</sub>                  | 7.26                           | 7.87                                    | 30.26                    | 40.35            | 80.97            | 4.41              |
| H <sub>2</sub>                   | 20.31                          | 22.05                                   | 42.11                    | 56.32            | 0.96             | 84.90             |
| H <sub>2</sub> O                 | 43.88                          | 39.10                                   | 25.28                    | 0.18             | 0.20             | 0.01              |

|                                  |                            |                               |           |           |       |      |
|----------------------------------|----------------------------|-------------------------------|-----------|-----------|-------|------|
| N <sub>2</sub>                   | 0.61                       | 0.66                          | 0.56      | 0.75      | 13.17 | 7.94 |
| Ar                               | 0.55                       | 0.60                          | 0.50      | 0.67      | 1.34  | 1.03 |
| CH <sub>4</sub>                  | 0.01                       | 0.01                          | 0.01      | 0.01      | 1.37  | 0.04 |
| H <sub>2</sub> S                 | 0.49                       | 0.52                          | 0.46      | 0.62      | 1.97  | 0.00 |
| O <sub>2</sub>                   |                            |                               |           |           |       | 0.02 |
|                                  | <b>F6A</b>                 | <b>F6b</b>                    | <b>F7</b> | <b>F8</b> |       |      |
| Description                      | Cleaned syngas entering GT | Cleaned syngas entering Claus | Flue gas  | Stack gas |       |      |
| Temperature [K]                  | 291.86                     | 291.86                        | 834.21    | 413.43    |       |      |
| Pressure [MPa]                   | 5.2                        | 5.2                           | 0.11      | 0.11      |       |      |
| Flowrate [kmol·s <sup>-1</sup> ] | 5.14                       | 0.01                          | 38.56     | 38.56     |       |      |
| Enthalpy [MW]                    | -100.37                    | -0.15                         | -623.03   | -1132.1   |       |      |
| Entropy [kW·K <sup>-1</sup> ]    | -139.60                    | -0.21                         | 1256.34   | 411.8     |       |      |
| Exergy [MW]                      | 1100.42                    | 1.66                          | 292.52    | 34.2      |       |      |
| Composition [mol%]               |                            |                               |           |           |       |      |
| CO                               | 1.65                       | 1.65                          | 0.00      | 0.00      |       |      |
| CO <sub>2</sub>                  | 4.41                       | 4.41                          | 0.84      | 0.84      |       |      |
| H <sub>2</sub>                   | 84.90                      | 84.90                         | 0.00      | 0.00      |       |      |
| H <sub>2</sub> O                 | 0.01                       | 0.01                          | 12.20     | 12.20     |       |      |
| N <sub>2</sub>                   | 7.94                       | 7.94                          | 75.21     | 75.21     |       |      |
| Ar                               | 1.03                       | 1.03                          | 0.92      | 0.92      |       |      |
| CH <sub>4</sub>                  | 0.04                       | 0.04                          | 0.00      | 0.00      |       |      |
| H <sub>2</sub> S                 | 0.00                       | 0.00                          | 0.00      | 0.00      |       |      |
| O <sub>2</sub>                   | 0.02                       | 0.02                          | 10.83     | 10.83     |       |      |

Table S10: Breakdown of gas streams in the NETL Baseline Model

|                                  | <b>G1</b>                                | <b>G2</b>                                         | <b>G3</b>            | <b>G4</b>              |
|----------------------------------|------------------------------------------|---------------------------------------------------|----------------------|------------------------|
| Description                      | Stream entering Claus for sulfur removal | Water vapor exiting Steam cycle to be used in WGS | Vent gas exiting ASU | Vent gas exiting Steam |
| Temperature [K]                  | 322                                      | 597                                               | 302.9                | 406.4                  |
| Pressure [MPa]                   | 0.21                                     | 6.03                                              | 0.11                 | 0.30                   |
| Flowrate [kmol·s <sup>-1</sup> ] | 0.12                                     | 1.68                                              | 1.01                 | 0.01                   |
| Enthalpy [MW]                    | -23.98                                   | -392.79                                           | -1.06                | -1.81                  |
| Entropy [kW·K <sup>-1</sup> ]    | 2.68                                     | -95.86                                            | 1.67                 | -0.33                  |
| Exergy [MW]                      | 40.88                                    | 35.53                                             | 0.47                 | 0.09                   |
| Composition [mol%]               |                                          |                                                   |                      |                        |
| CO <sub>2</sub>                  | 44.91                                    |                                                   | 0.24                 |                        |
| H <sub>2</sub> O                 | 5.77                                     | 100                                               |                      | 100                    |
| N <sub>2</sub>                   | 7.71                                     |                                                   | 91.65                |                        |
| Ar                               | 0.08                                     |                                                   | 0.87                 |                        |
| H <sub>2</sub> S                 | 40.99                                    |                                                   |                      |                        |
| O <sub>2</sub>                   | 0.54                                     |                                                   | 7.24                 |                        |

Table S11: Breakdown of liquid streams in the NETL Baseline Model

|             | <b>L1</b>               | <b>L2</b>                         | <b>L3</b>      | <b>L4</b>                   | <b>L5</b>               |
|-------------|-------------------------|-----------------------------------|----------------|-----------------------------|-------------------------|
| Description | Water entering Gasifier | Sump water used in HX in Gasifier | Scrubber water | Sour water exiting Scrubber | Sour water exiting Cool |

|                                  |                                |                                       |                            |                                           |                     |
|----------------------------------|--------------------------------|---------------------------------------|----------------------------|-------------------------------------------|---------------------|
| Temperature [K]                  | 333                            | 373                                   | 343                        | 484.07                                    | 370.28              |
| Pressure [MPa]                   | 6                              | 6                                     | 8.275                      | 5.5                                       | 5.429               |
| Flowrate [kmol·s <sup>-1</sup> ] | 1.42                           | 2.94                                  | 2.40                       | 3.15                                      | 2.62                |
| Enthalpy [MW]                    | -403.67                        | -826.21                               | -678.67                    | -856.14                                   | -736.12             |
| Entropy [kW·K <sup>-1</sup> ]    | -224.99                        | -438.64                               | -366.99                    | -397.40                                   | -384.02             |
| Exergy [MW]                      | 0.33                           | 2.01                                  | 0.86                       | 10.64                                     | 2.56                |
| Composition [mol%]               |                                |                                       |                            |                                           |                     |
| CO                               |                                |                                       |                            | 0.02                                      |                     |
| CO <sub>2</sub>                  |                                |                                       |                            | 0.02                                      | 0.36                |
| H <sub>2</sub>                   |                                |                                       |                            | 0.02                                      | 0.04                |
| H <sub>2</sub> O                 | 100.0                          | 100.0                                 | 100.0                      | 99.94                                     | 99.58               |
| H <sub>2</sub> S                 |                                |                                       |                            |                                           | 0.02                |
|                                  | <b>L6</b>                      | <b>L7</b>                             | <b>L8</b>                  | <b>L9</b>                                 | <b>L10</b>          |
| Description                      | Make-up water entering Selexol | Water leaving CO <sub>2</sub> streams | Knockout water exiting ASU | Make-up water entering condenser in Steam | Waste exiting Steam |
| Temperature [K]                  | 322                            | 303                                   | 302.9                      | 293                                       | 420.82              |
| Pressure [MPa]                   | 0.21                           | 2.1                                   | 0.101                      | 0.1                                       | 0.45                |
| Flowrate [kmol·s <sup>-1</sup> ] | 0.01                           | 0.01                                  | 0.09                       | 1.80                                      | 0.11                |
| Enthalpy [MW]                    | -2.42                          | -1.55                                 | -24.78                     | -516.01                                   | -31.36              |
| Entropy [kW·K <sup>-1</sup> ]    | -1.32                          | -0.90                                 | -14.34                     | -296.17                                   | -15.53              |
| Exergy [MW]                      | 0.00051                        | 0.0002                                | 6.66e-5                    | 0.01                                      | 0.17                |
| Composition [mol%]               |                                |                                       |                            |                                           |                     |
| H <sub>2</sub> O                 | 100.0                          | 100                                   | 100.0                      | 100.0                                     | 100.0               |
| H <sub>2</sub> S                 |                                |                                       |                            |                                           |                     |
|                                  | <b>L11</b>                     | <b>L12</b>                            |                            |                                           |                     |
| Description                      | Make-up water added to Claus   | Sulfur product                        |                            |                                           |                     |
| Temperature [K]                  | 293                            | 458.71                                |                            |                                           |                     |
| Pressure [MPa]                   | 0.1                            | 0.176                                 |                            |                                           |                     |
| Flowrate [kmol·s <sup>-1</sup> ] | 0.93                           | 0.00650                               |                            |                                           |                     |
| Enthalpy [MW]                    | -268.14                        | 0.117                                 |                            |                                           |                     |
| Entropy [kW·K <sup>-1</sup> ]    | -157.30                        | 0.681                                 |                            |                                           |                     |
| Exergy [MW]                      | 0.0052                         | 30.24                                 |                            |                                           |                     |
| Composition [mol%]               |                                |                                       |                            |                                           |                     |
| H <sub>2</sub> O                 | 100.0                          | 6.61                                  |                            |                                           |                     |
| S <sub>8</sub>                   |                                | 93.39                                 |                            |                                           |                     |

Table S12: Breakdown of nitrogen streams in the NETL Baseline Model

|                                  | <b>N1</b>                | <b>N2</b>           |
|----------------------------------|--------------------------|---------------------|
| Description                      | Nitrogen sent to Selexol | Nitrogen sent to GT |
| Temperature [K]                  | 303                      | 469                 |
| Pressure [MPa]                   | 3.17                     | 3.17                |
| Flowrate [kmol·s <sup>-1</sup> ] | 0.35                     | 4.90                |
| Enthalpy [MW]                    | -0.03                    | 24.27               |
| Entropy [kW·K <sup>-1</sup> ]    | -10.05                   | -74.26              |

|                    |       |       |
|--------------------|-------|-------|
| Exergy [MW]        | 3.24  | 50.01 |
| Composition [mol%] |       |       |
| N <sub>2</sub>     | 99.23 | 99.24 |
| Ar                 | 0.24  | 0.24  |
| O <sub>2</sub>     | 0.53  | 0.52  |

Figure S1 breaks down each subsystem analyzed in the NETL Baseline Model, showing all entering and exiting material, heat and work streams. Included also is the irreversible entropy production, calculated from Aspen values, and the exergy and normalized exergy destruction, from our calculations.

Key

Enthalpy [MW] / Entropy [kW·K<sup>-1</sup>] / Exergy [MW]

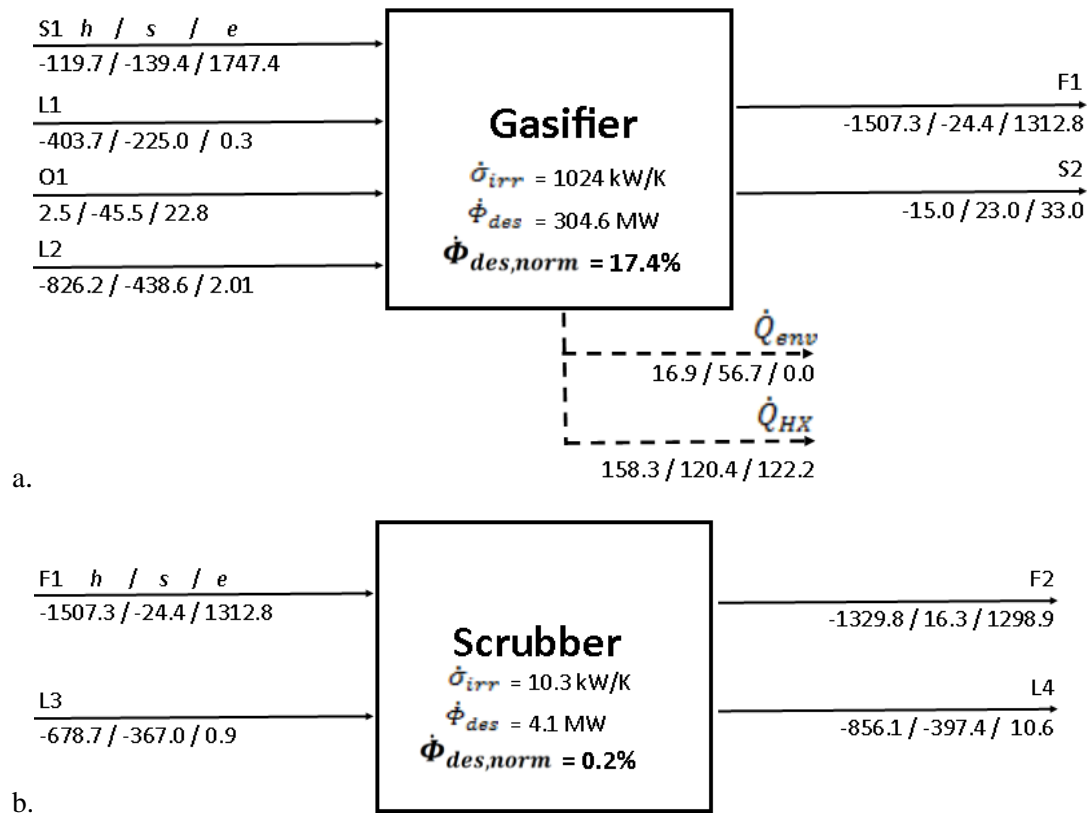



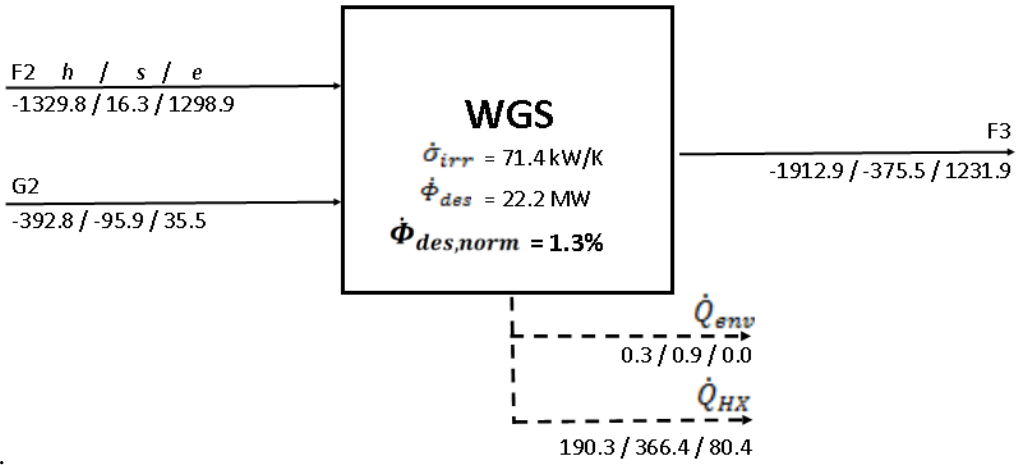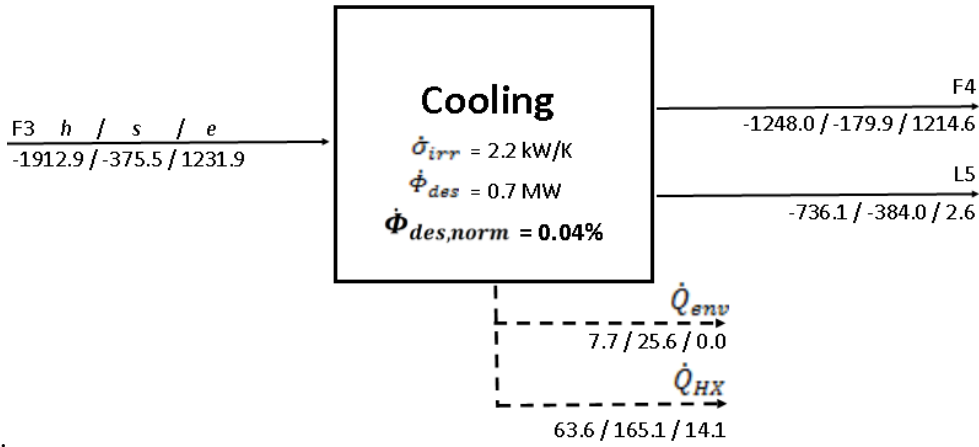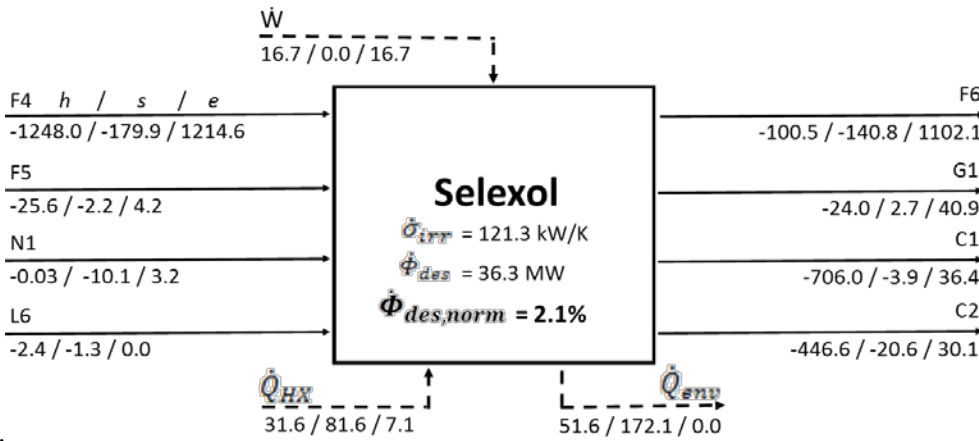

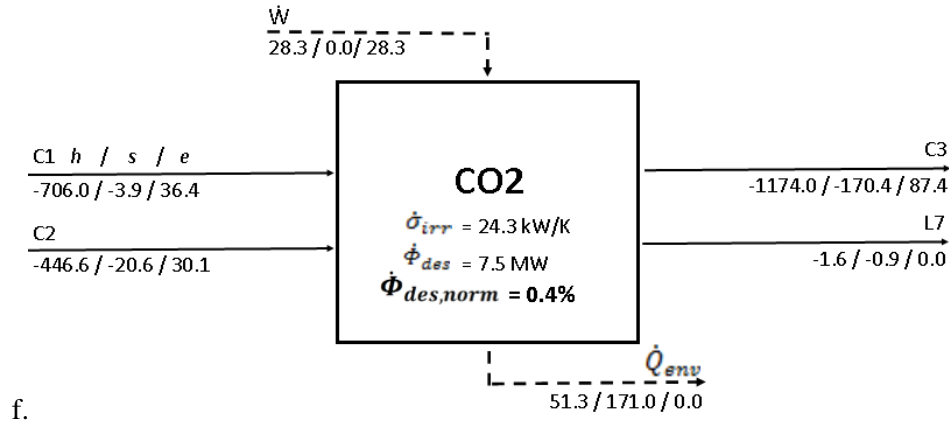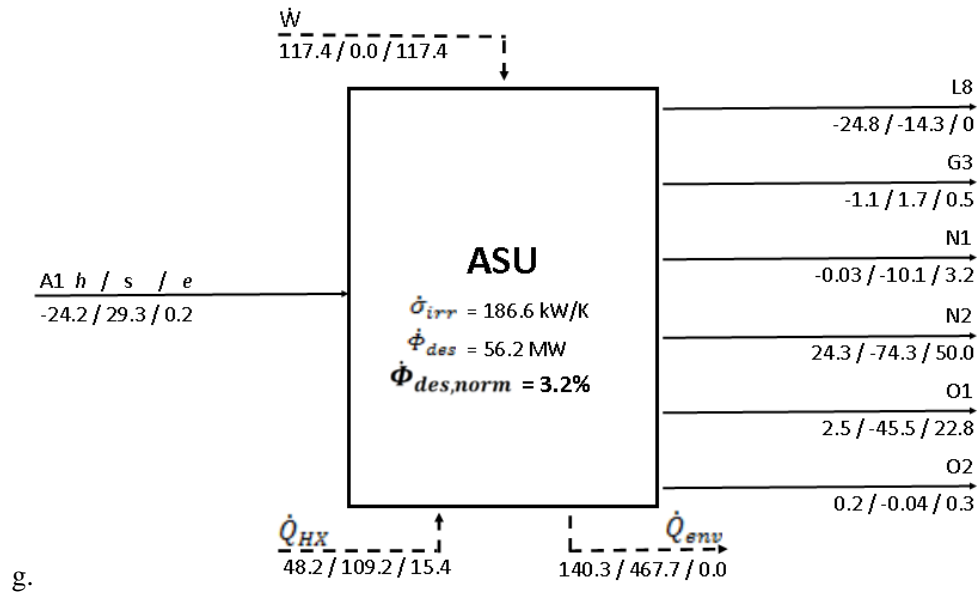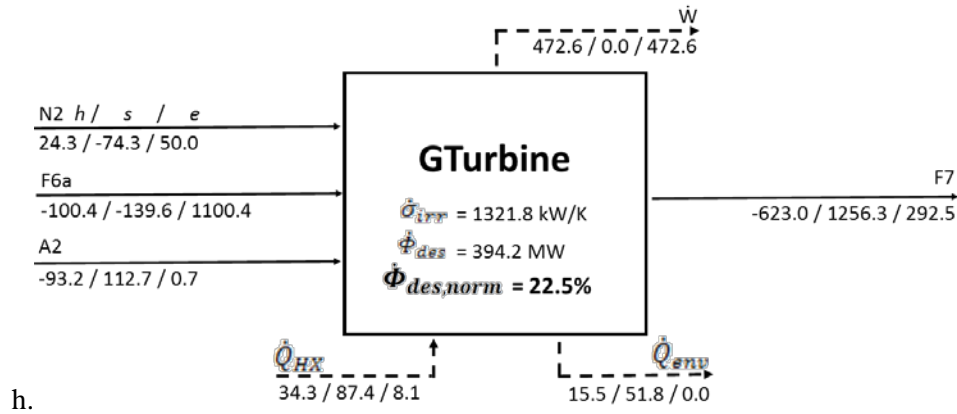

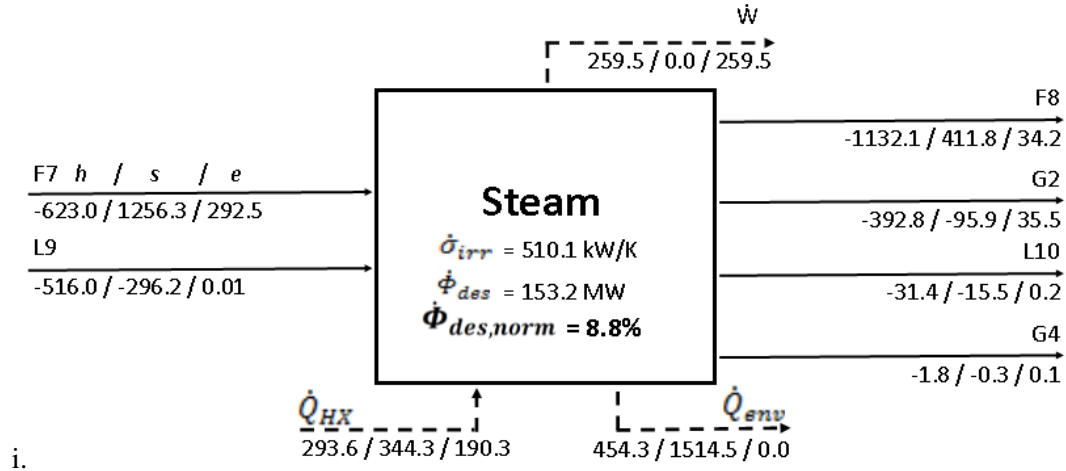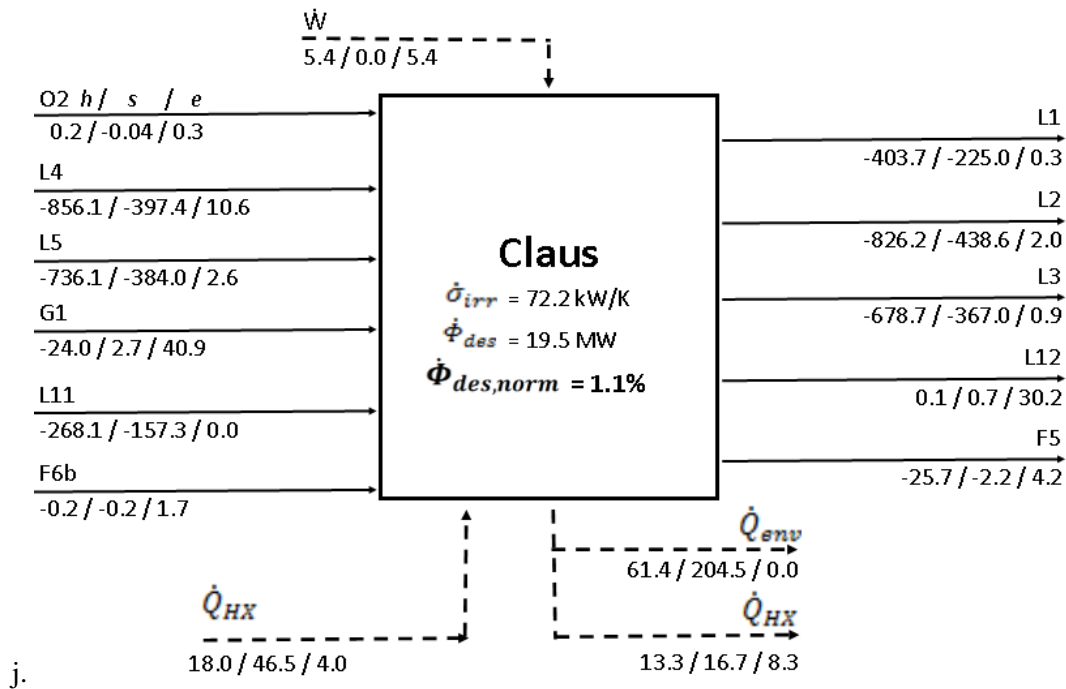

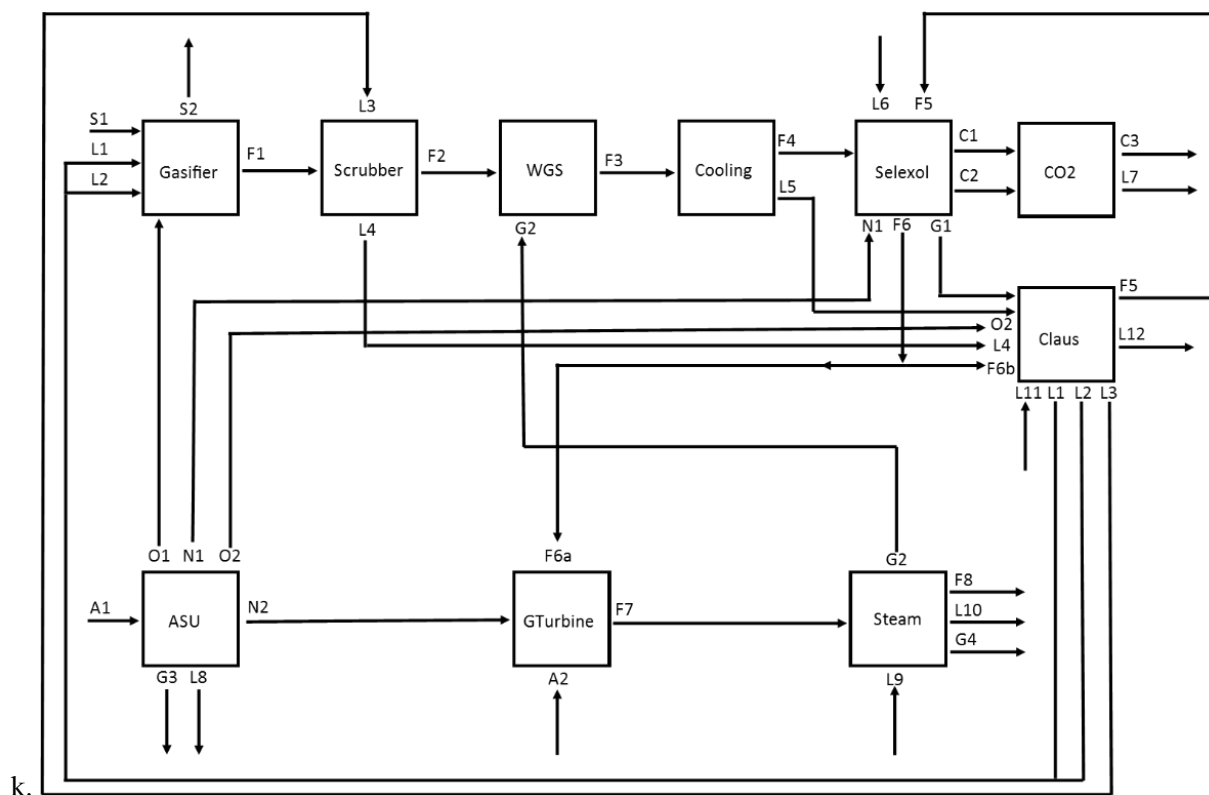

Figure S1: Breakdown of each subsystem analyzed in the NETL Baseline Model (a-j). Each diagram includes the enthalpy [MW] / entropy [ $\text{kW} \cdot \text{K}^{-1}$ ] / exergy [MW] for all material, heat, and work streams, the irreversible entropy production, and the exergy destruction and normalized exergy destruction. (k) is the overall process diagram.

## Hydrogen Membrane Model

The same renaming approach was applied to the Hydrogen Membrane Model, and the new stream names are stated in Table S13.

Table S13: Renamed streams in the Hydrogen Membrane Model following the structure presented in Table S1

| Original Stream Name | New Name | Subsystem | Input/Output |
|----------------------|----------|-----------|--------------|
| Coal                 | S1       | Gasifier  | In           |
| Slurry-w             | L1       | Gasifier  | In           |
| O2X                  | O1       | Gasifier  | In           |
| Sump-w               | L2       | Gasifier  | In           |
| rawgas               | F1       | Gasifier  | Out          |
| slag                 | S2       | Gasifier  | Out          |
| Rawgas2              | F1       | Scrubber  | In           |
| Scrubwat             | L3       | Scrubber  | In           |
| SG4                  | F2       | Scrubber  | Out          |
| Waste (sour1)        | L4       | Scrubber  | Out          |
| SH1                  | F2       | WGS       | In           |
| 10                   | G2       | WGS       | In           |
| SH9 (23)             | F9       | WGS       | Out          |
| FDHOT (23)           | F9       | Membrane  | In           |

|                 |     |          |     |
|-----------------|-----|----------|-----|
| SWCOLD (24)     | N3  | Membrane | In  |
| Retcold (26)    | F3  | Membrane | Out |
| Percold (25)    | F10 | Membrane | Out |
| CO2 (26)        | F3  | Cool     | In  |
| C4              | F4  | Cool     | Out |
| Sour 1 (sour 2) | L5  | Cool     | Out |
| Coolsynb        | F4  | Selexol  | In  |
| Tailgasb        | F5  | Selexol  | In  |
| N2-Selex        | N1  | Selexol  | In  |
| Water2          | L6  | Selexol  | In  |
| Clnsynb         | F6  | Selexol  | Out |
| Toclausb        | G1  | Selexol  | Out |
| Lp-CO2          | C1  | Selexol  | Out |
| Mp-CO2          | C2  | Selexol  | Out |
| Lp1             | C1  | CO2      | In  |
| Mp1             | C2  | CO2      | In  |
| Co2-prod        | C3  | CO2      | Out |
| Tegwater        | L7  | CO2      | Out |
| Air1            | A1  | ASU      | In  |
| Knockout        | L8  | ASU      | Out |
| ASU-vent        | G3  | ASU      | Out |
| N2Hot2          | N2  | ASU      | Out |
| To-selex2       | N1  | ASU      | Out |
| O2HP            | O1  | ASU      | Out |
| Oxy1            | O2  | ASU      | Out |
| T-Mem2 (24)     | N3  | ASU      | Out |
| N2Dil           | N2  | GTurbine | In  |
| GT1             | F6a | GTurbine | In  |
| 20              | A2  | GTurbine | In  |
| GT01 (25)       | F10 | GTurbine | In  |
| GT7             | F7  | GTurbine | Out |
| Oxy2            | O2  | Claus    | In  |
| Sour1           | L4  | Claus    | In  |
| Sour2           | L5  | Claus    | In  |
| Acid1           | G1  | Claus    | In  |
| Makeupw         | L11 | Claus    | In  |
| H2              | F6b | Claus    | In  |
| S-out           | L12 | Claus    | Out |
| Tail5           | F5  | Claus    | Out |
| Toslurryw       | L1  | Claus    | Out |
| Tosump          | L2  | Claus    | Out |
| Toscrub         | L3  | Claus    | Out |
| Flue            | F7  | Steam    | In  |
| Makeup-w        | L9  | Steam    | In  |
| Newstack        | F8  | Steam    | Out |
| To-shift        | G2  | Steam    | Out |
| Waste           | L10 | Steam    | Out |
| Ventgas         | G4  | Steam    | Out |

Table S14 through Table S18 give a more in-depth description of each of the stream categories. The temperature, pressure, flowrate, enthalpy, entropy, exergy, and composition are presented. The enthalpy and entropy values are from the Aspen model and the exergy values are from our calculations.

Table S14: Breakdown of carbon dioxide streams in the Hydrogen Membrane Model

|                                  | <b>C1</b>                                           | <b>C2</b>                                           | <b>C3</b>                                    |
|----------------------------------|-----------------------------------------------------|-----------------------------------------------------|----------------------------------------------|
| Description                      | Low pressure CO <sub>2</sub> stream exiting Selexol | Mid-pressure CO <sub>2</sub> stream exiting Selexol | Supercritical CO <sub>2</sub> product stream |
| Temperature [K]                  | 284.42                                              | 293.50                                              | 322.54                                       |
| Pressure [MPa]                   | 0.5                                                 | 1.5                                                 | 15.3                                         |
| Flowrate [kmol·s <sup>-1</sup> ] | 1.60                                                | 1.32                                                | 2.91                                         |
| Enthalpy [MW]                    | -628.83                                             | -519.26                                             | -1170.22                                     |
| Entropy [kW·K <sup>-1</sup> ]    | -20.04                                              | -28.03                                              | -170.32                                      |
| Exergy [MW]                      | 37.21                                               | 34.94                                               | 86.3                                         |
| Composition [mol%]               |                                                     |                                                     |                                              |
| CO                               |                                                     | 0.04                                                | 0.02                                         |
| CO <sub>2</sub>                  | 99.87                                               | 99.53                                               | 99.74                                        |
| H <sub>2</sub>                   | 0.01                                                | 0.21                                                | 0.10                                         |
| H <sub>2</sub> O                 | 0.11                                                | 0.05                                                | 0.05                                         |
| N <sub>2</sub>                   |                                                     | 0.09                                                | 0.05                                         |
| Ar                               | 0.01                                                | 0.08                                                | 0.04                                         |

Table S15: Breakdown of fuel streams in the Hydrogen Membrane Model

|                                  | <b>F1</b>                  | <b>F2</b>                         | <b>F3</b>                  | <b>F4</b>     | <b>F5</b>                    | <b>F6</b>            |
|----------------------------------|----------------------------|-----------------------------------|----------------------------|---------------|------------------------------|----------------------|
| Description                      | Raw gas exiting Gasifier   | Scrubbed gas exiting the Scrubber | Retentate entering Cooling | Cooled syngas | Claus Recycle                | Cleaned syngas       |
| Temperature [K]                  | 489.10                     | 484.07                            | 423                        | 312           | 308                          | 288.92               |
| Pressure [MPa]                   | 5.5                        | 5.5                               | 5.43                       | 5.43          | 5.35                         | 5.2                  |
| Flowrate [kmol·s <sup>-1</sup> ] | 9.46                       | 8.72                              | 5.53                       | 5.13          | 0.07                         | 2.40                 |
| Enthalpy [MW]                    | -1507.27                   | -1329.80                          | -1293.40                   | -1218.70      | -23.34                       | -70.37               |
| Entropy [kW·K <sup>-1</sup> ]    | -24.39                     | 16.31                             | -70.05                     | -113.44       | -2.01                        | -55.66               |
| Exergy [MW]                      | 1312.79                    | 1298.90                           | 579.68                     | 571.64        | 3.57                         | 457.68               |
| Composition [mol%]               |                            |                                   |                            |               |                              |                      |
| CO                               | 26.89                      | 29.19                             | 1.50                       | 1.62          | 0.01                         | 3.45                 |
| CO <sub>2</sub>                  | 7.26                       | 7.87                              | 55.38                      | 59.65         | 82.72                        | 6.40                 |
| H <sub>2</sub>                   | 20.31                      | 22.05                             | 31.68                      | 34.15         | 0.80                         | 73.03                |
| H <sub>2</sub> O                 | 43.88                      | 39.10                             | 7.37                       | 0.20          | 0.20                         | 0.01                 |
| N <sub>2</sub>                   | 0.61                       | 0.66                              | 2.27                       | 2.44          | 11.82                        | 14.87                |
| Ar                               | 0.55                       | 0.60                              | 0.92                       | 0.99          | 1.48                         | 2.14                 |
| CH <sub>4</sub>                  | 0.01                       | 0.01                              | 0.02                       | 0.02          | 1.10                         | 0.07                 |
| H <sub>2</sub> S                 | 0.49                       | 0.52                              | 0.85                       | 0.92          | 1.87                         |                      |
| O <sub>2</sub>                   |                            |                                   | 0.01                       | 0.01          |                              | 0.03                 |
|                                  | <b>F6A</b>                 | <b>F6b</b>                        | <b>F7</b>                  | <b>F8</b>     | <b>F9</b>                    | <b>F10</b>           |
| Description                      | Cleaned syngas entering GT | Cleaned syngas entering Claus     | Flue gas                   | Stack gas     | Syngas entering the Membrane | Permeate entering GT |
| Temperature [K]                  | 293.07                     | 293.07                            | 839.19                     | 405.00        | 522.51                       | 522                  |
| Pressure [MPa]                   | 5.2                        | 5.2                               | 0.105                      | 0.105         | 5.43                         | 3.16                 |
| Flowrate [kmol·s <sup>-1</sup> ] | 2.39                       | 0.0077                            | 38.56                      | 38.56         | 10.40                        | 7.65                 |

|                               |        |       |          |          |          |         |
|-------------------------------|--------|-------|----------|----------|----------|---------|
| Enthalpy [MW]                 | -70.18 | -0.19 | -1151.64 | -1622.94 | -1809.36 | -518.77 |
| Entropy [kW·K <sup>-1</sup> ] | -53.08 | -0.15 | 1208.07  | 310.06   | -147.51  | -113.0  |
| Exergy [MW]                   | 456.42 | 1.25  | 308.75   | 40.50    | 1268.83  | 698.76  |
| Composition [mol%]            |        |       |          |          |          |         |
| CO                            | 3.45   | 3.45  |          |          | 0.82     | 0.03    |
| CO <sub>2</sub>               | 6.40   | 6.40  | 0.87     | 0.87     | 30.26    | 1.10    |
| H <sub>2</sub>                | 73.03  | 73.03 |          |          | 42.12    | 34.37   |
| H <sub>2</sub> O (g)          | 0.01   | 0.01  | 17.97    | 17.97    | 25.26    | 29.02   |
| N <sub>2</sub>                | 14.87  | 14.87 | 69.47    | 69.47    | 0.56     | 35.17   |
| Ar                            | 2.14   | 2.14  | 0.90     | 0.90     | 0.5      | 0.11    |
| CH <sub>4</sub>               | 0.07   | 0.07  |          |          | 0.01     |         |
| H <sub>2</sub> S              |        |       |          |          | 0.47     | 0.02    |
| O <sub>2</sub>                | 0.03   | 0.03  | 10.79    | 10.79    |          | 0.18    |

Table S16: Breakdown of gas streams in the Hydrogen Membrane Model

|                                  | G1                                       | G2                                                | G3                   | G4                     |
|----------------------------------|------------------------------------------|---------------------------------------------------|----------------------|------------------------|
| Description                      | Stream entering Claus for sulfur removal | Water vapor exiting Steam cycle to be used in WGS | Vent gas exiting ASU | Vent gas exiting Steam |
| Temperature [K]                  | 322                                      | 597                                               | 301.34               | 406.38                 |
| Pressure [MPa]                   | 0.21                                     | 6.03                                              | 0.11                 | 0.299                  |
| Flowrate [kmol·s <sup>-1</sup> ] | 0.12                                     | 1.68                                              | 3.23                 | 0.01                   |
| Enthalpy [MW]                    | -24.33                                   | -392.79                                           | -0.66                | -1.65                  |
| Entropy [kW·K <sup>-1</sup> ]    | 2.58                                     | -95.86                                            | 2.98                 | -0.30                  |
| Exergy [MW]                      | 39.95                                    | 35.53                                             | 2.12                 | 0.08                   |
| Composition [mol%]               |                                          |                                                   |                      |                        |
| CO <sub>2</sub>                  | 46.91                                    |                                                   | 0.07                 |                        |
| H <sub>2</sub> O                 | 5.77                                     | 100                                               |                      | 100                    |
| N <sub>2</sub>                   | 5.86                                     |                                                   | 96.84                |                        |
| Ar                               | 0.06                                     |                                                   | 0.48                 |                        |
| H <sub>2</sub> S                 | 41.00                                    |                                                   |                      |                        |
| O <sub>2</sub>                   | 0.40                                     |                                                   | 2.61                 |                        |

Table S17: Breakdown of liquid streams in the Hydrogen Membrane Model

|                                  | L1                      | L2                                | L3             | L4                          | L5                      |
|----------------------------------|-------------------------|-----------------------------------|----------------|-----------------------------|-------------------------|
| Description                      | Water entering Gasifier | Sump water used in HX in Gasifier | Scrubber water | Sour water exiting Scrubber | Sour water exiting Cool |
| Temperature [K]                  | 333                     | 373                               | 343            | 484.07                      | 360.42                  |
| Pressure [MPa]                   | 6                       | 6                                 | 8.275          | 5.5                         | 5.43                    |
| Flowrate [kmol·s <sup>-1</sup> ] | 1.42                    | 2.94                              | 2.40           | 3.15                        | 0.40                    |
| Enthalpy [MW]                    | -403.8                  | -826.6                            | -682.6         | -856.14                     | -112.6                  |
| Entropy [kW·K <sup>-1</sup> ]    | -224.6                  | -437.7                            | -446.9         | -397.40                     | -59.26                  |
| Exergy [MW]                      | 0.33                    | 2.01                              | 1.0            | 10.64                       | 0.38                    |
| Composition [mol%]               |                         |                                   |                |                             |                         |
| CO                               |                         |                                   |                | 0.02                        |                         |
| CO <sub>2</sub>                  |                         |                                   |                | 0.02                        | 0.58                    |
| H <sub>2</sub>                   |                         |                                   |                | 0.02                        | 0.03                    |
| H <sub>2</sub> O                 | 100.0                   | 100.0                             | 100.0          | 99.94                       | 99.37                   |

|                                  |                                |                                       |                            |                                           |                     |
|----------------------------------|--------------------------------|---------------------------------------|----------------------------|-------------------------------------------|---------------------|
| H <sub>2</sub> S                 |                                |                                       |                            |                                           | 0.03                |
|                                  | <b>L6</b>                      | <b>L7</b>                             | <b>L8</b>                  | <b>L9</b>                                 | <b>L10</b>          |
| Description                      | Make-up water entering Selexol | Water leaving CO <sub>2</sub> streams | Knockout water exiting ASU | Make-up water entering condenser in Steam | Waste exiting Steam |
| Temperature [K]                  | 322                            | 303                                   | 302.91                     | 293                                       | 420.82              |
| Pressure [MPa]                   | 0.21                           | 2.1                                   | 0.101                      | 0.10                                      | 0.45                |
| Flowrate [kmol·s <sup>-1</sup> ] | 0.01                           | 0.001                                 | 0.09                       | 1.80                                      | 0.12                |
| Enthalpy [MW]                    | -1.46                          | -0.25                                 | -24.76                     | -516.20                                   | -31.91              |
| Entropy [kW·K <sup>-1</sup> ]    | -0.80                          | -0.15                                 | -14.33                     | -296.37                                   | -15.80              |
| Exergy [MW]                      | 0.0003                         | 3.25e-5                               | 6.66e-5                    | 0.01                                      | 1.44                |
| Composition [mol%]               |                                |                                       |                            |                                           |                     |
| H <sub>2</sub> O                 | 100.0                          | 100.0                                 | 100.0                      | 100.0                                     | 100.0               |
|                                  | <b>L11</b>                     | <b>L12</b>                            |                            |                                           |                     |
| Description                      | Make-up water added to Claus   | Sulfur product                        |                            |                                           |                     |
| Temperature [K]                  | 293                            | 460.02                                |                            |                                           |                     |
| Pressure [MPa]                   | 0.10                           | 0.18                                  |                            |                                           |                     |
| Flowrate [kmol·s <sup>-1</sup> ] | 3.61                           | 0.0065                                |                            |                                           |                     |
| Enthalpy [MW]                    | -910.00                        | 0.12                                  |                            |                                           |                     |
| Entropy [kW·K <sup>-1</sup> ]    | -610.02                        | 0.72                                  |                            |                                           |                     |
| Exergy [MW]                      | 0.02                           | 28.53                                 |                            |                                           |                     |
| Composition [mol%]               |                                |                                       |                            |                                           |                     |
| H <sub>2</sub> O                 | 100.0                          | 6.44                                  |                            |                                           |                     |
| S <sub>8</sub>                   |                                | 93.56                                 |                            |                                           |                     |

Table S18: Breakdown of nitrogen streams in the Hydrogen Membrane Model.

|                                  |                          |                     |                           |
|----------------------------------|--------------------------|---------------------|---------------------------|
|                                  | <b>N1</b>                | <b>N2</b>           | <b>N3</b>                 |
| Description                      | Nitrogen sent to Selexol | Nitrogen sent to GT | Nitrogen sent to Membrane |
| Temperature [K]                  | 303                      | 469                 | 364.1                     |
| Pressure [MPa]                   | 3.17                     | 3.17                | 3.17                      |
| Flowrate [kmol·s <sup>-1</sup> ] | 0.23                     | 0.02                | 2.79                      |
| Enthalpy [MW]                    | -0.02                    | 0.09                | 4.98                      |
| Entropy [kW·K <sup>-1</sup> ]    | -6.60                    | -0.28               | -63.32                    |
| Exergy [MW]                      | 2.13                     | 0.19                | 25.93                     |
| Composition [mol%]               |                          |                     |                           |
| N <sub>2</sub>                   | 99.23                    | 99.24               | 99.24                     |
| Ar                               | 0.24                     | 0.24                | 0.24                      |
| O <sub>2</sub>                   | 0.53                     | 0.52                | 0.52                      |

Figure S2 breaks down each subsystem analyzed in the Hydrogen Membrane Model, showing all entering and exiting material, heat and work streams. Included also is the irreversible entropy production, calculated from Aspen values, and the exergy and normalized exergy destruction, from our calculations.



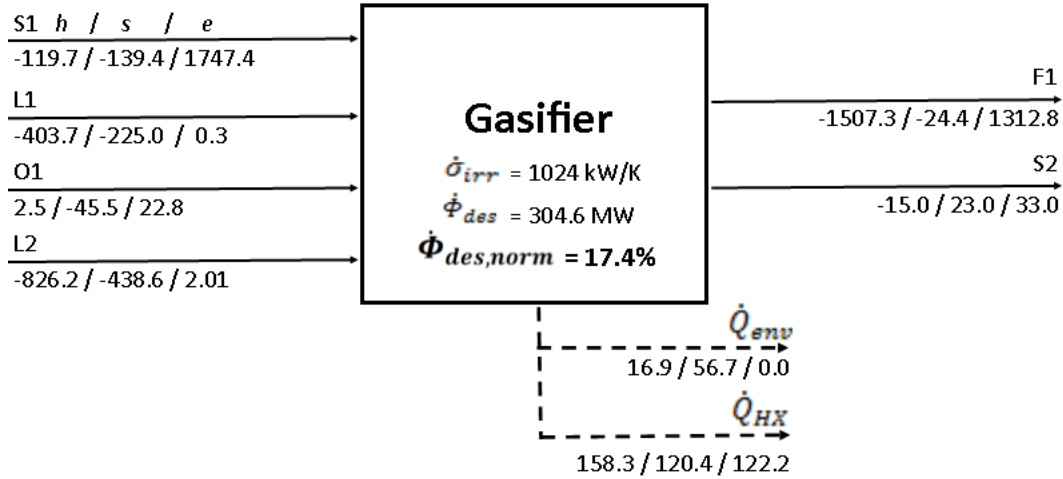

a.

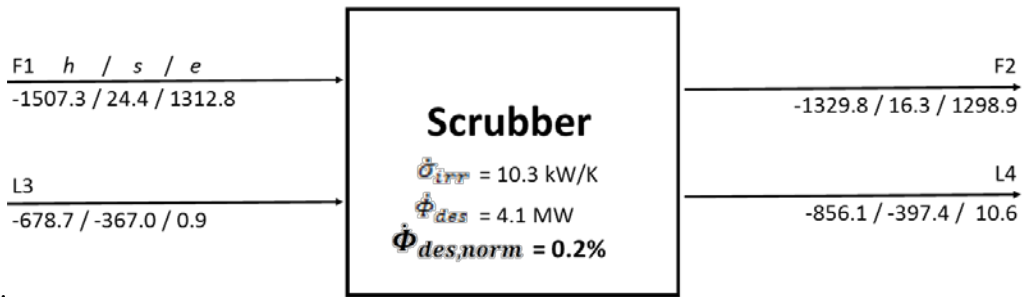

b.

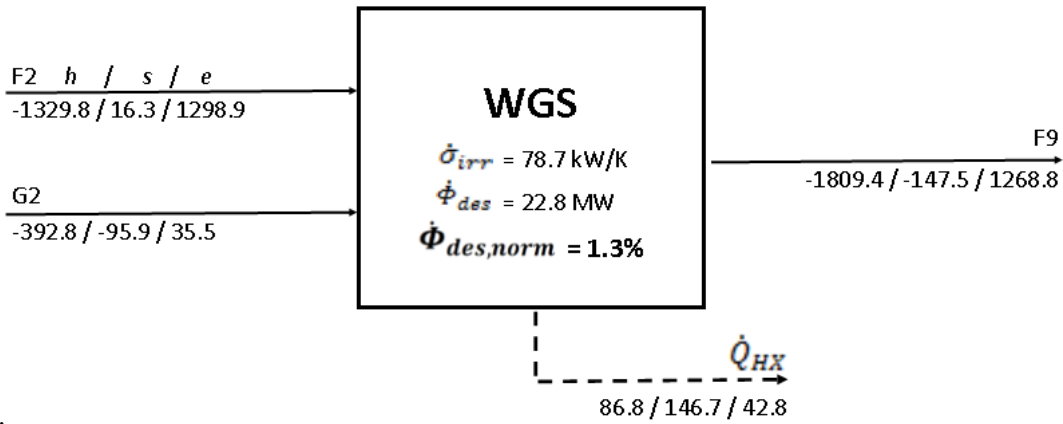

c.

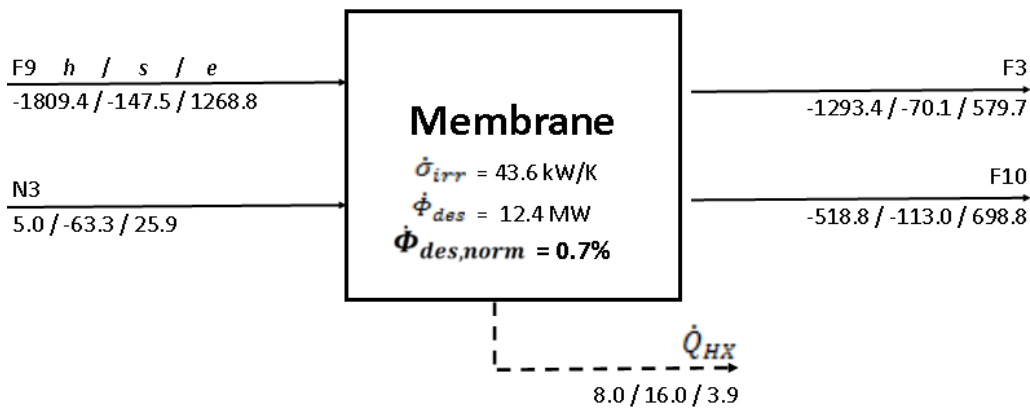

d.

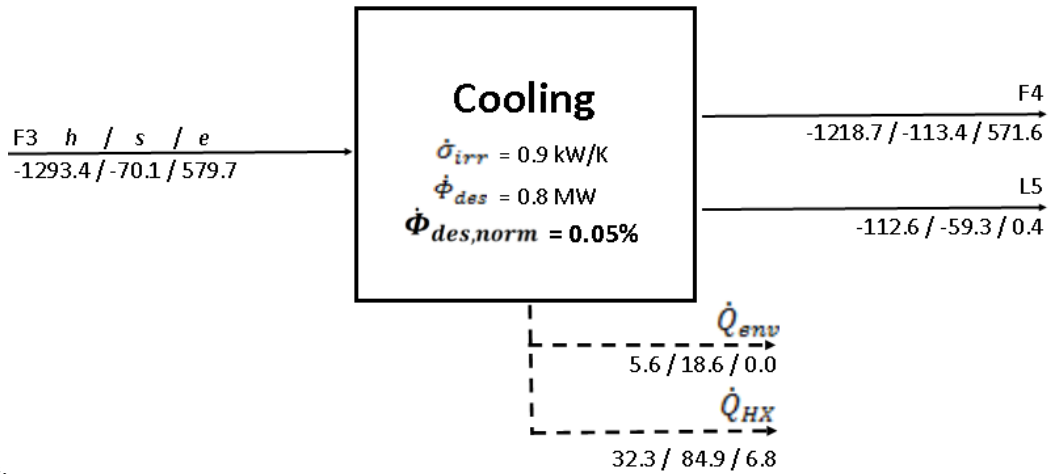

e.

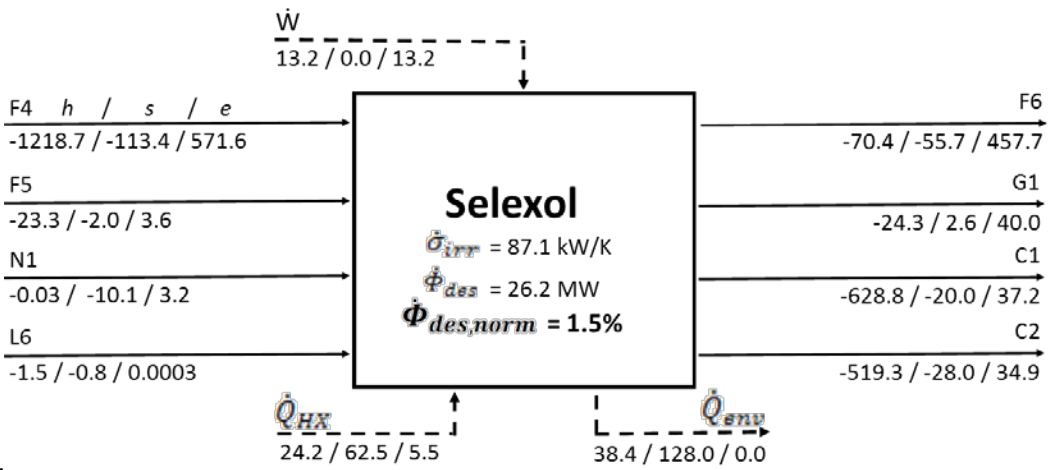

f.

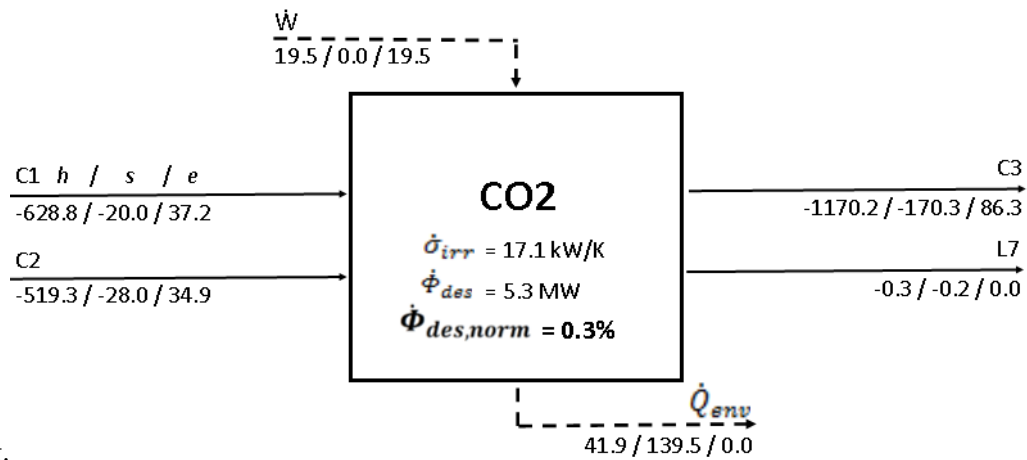

g.

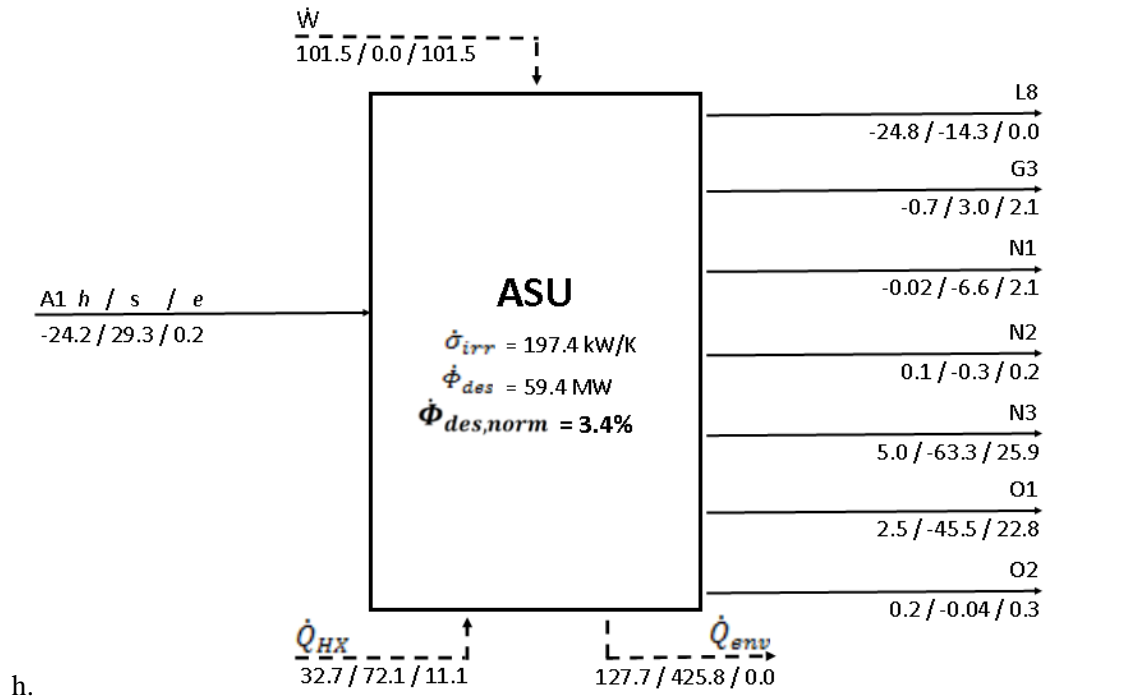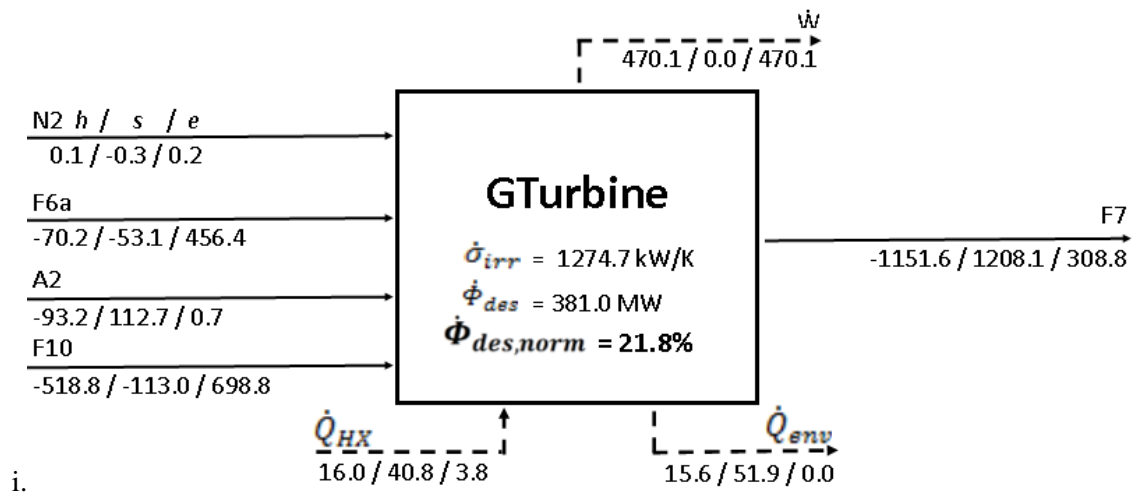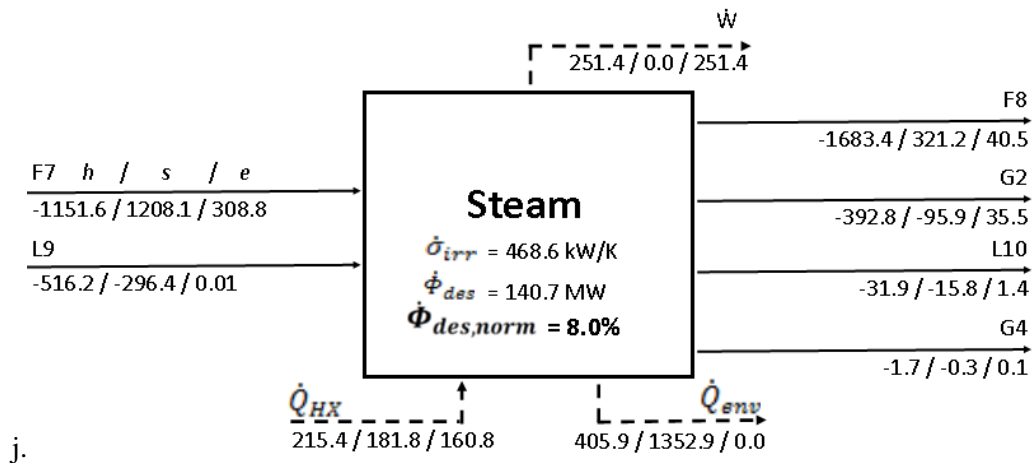

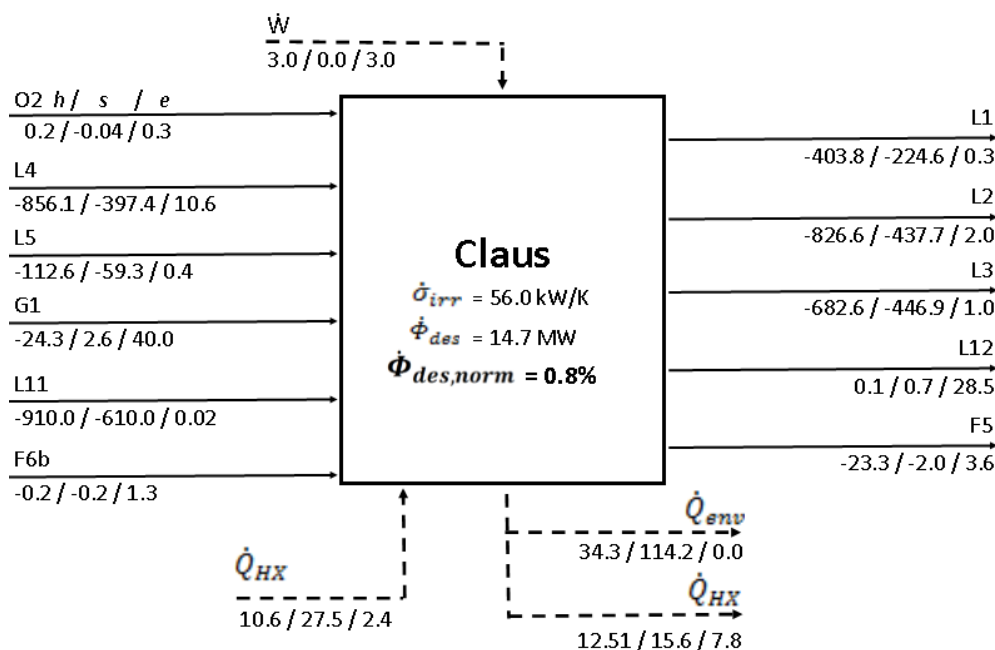

k.

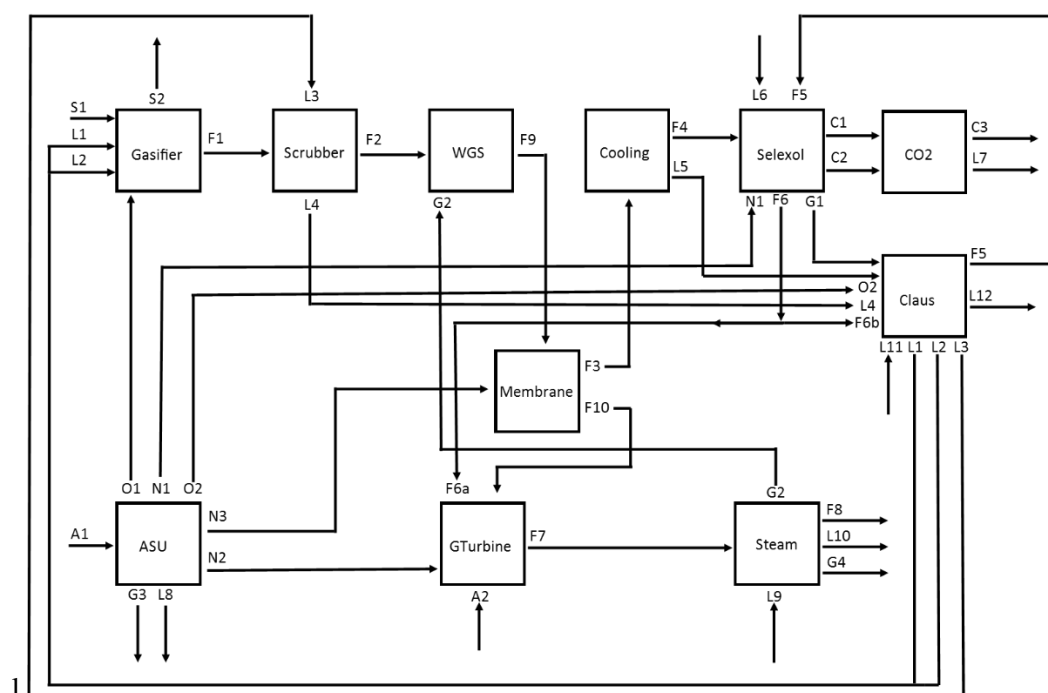

l.

Figure S2: Breakdown of each subsystem analyzed in the Hydrogen Membrane Model (a-k). Each diagram includes the enthalpy [MW] / entropy [kW·K<sup>-1</sup>] / exergy [MW] for all material, heat, and work streams, the irreversible entropy production, and the exergy destruction and normalized exergy destruction. (l) is the overall process flow diagram.

## CO<sub>2</sub> Membrane Model

Table S19 gives the new names used for streams in the CO<sub>2</sub> Membrane Model. It describes the subsystem and whether the stream is entering or exiting. The original stream names can be found in the included AspenPlus NETL Baseline Model.

Table S19: Renamed streams in the CO<sub>2</sub> Membrane Model following the structure presented in Table S1

| Original Stream Name | New Name | Subsystem | Input / Output |
|----------------------|----------|-----------|----------------|
| Coal                 | S1       | Gasifier  | In             |
| Slurry-w             | L1       | Gasifier  | In             |
| O2X                  | O1       | Gasifier  | In             |
| Sump-w               | L2       | Gasifier  | In             |
| rawgas               | F1       | Gasifier  | Out            |
| slag                 | S2       | Gasifier  | Out            |
| Rawgas2              | F1       | Scrubber  | In             |
| Scrubwat             | L3       | Scrubber  | In             |
| SG4                  | F2       | Scrubber  | Out            |
| Waste (sour1)        | L4       | Scrubber  | Out            |
| SH1                  | F2       | WGS       | In             |
| I0                   | G2       | WGS       | In             |
| SH9 (23)             | F3       | WGS       | Out            |
| CO2 (23)             | F3       | Cool      | In             |
| C4                   | F9       | Cool      | Out            |
| Sour 1 (sour 2)      | L5       | Cool      | Out            |
| FDHot                | F9       | Membrane  | In             |
| Retcold              | F4       | Membrane  | Out            |
| Percold              | C3       | Membrane  | Out            |
| Coolsynb             | F4       | Selexol   | In             |
| Tailgasb             | F5       | Selexol   | In             |
| NIT2                 | N1       | Selexol   | In             |
| Water2               | L6       | Selexol   | In             |
| Clnsynb              | F6       | Selexol   | Out            |
| Toclausb             | G1       | Selexol   | Out            |
| Lp-CO2               | C1       | Selexol   | Out            |
| Mp-CO2               | C2       | Selexol   | Out            |
| Lp1                  | C1       | CO2       | In             |
| Mp1                  | C2       | CO2       | In             |
| Mem-CO2              | C3       | CO2       | In             |
| Co2-prod             | C4       | CO2       | Out            |
| Tegwater             | L7       | CO2       | Out            |
| Air1                 | A1       | ASU       | In             |
| Knockout             | L8       | ASU       | Out            |
| ASU-vent             | G3       | ASU       | Out            |
| N2Hot2               | N2       | ASU       | Out            |
| To-selex2            | N1       | ASU       | Out            |
| O2HP                 | O1       | ASU       | Out            |
| Oxy1                 | O2       | ASU       | Out            |
| N2Dil                | N2       | GTurbine  | In             |
| GT1                  | F6a      | GTurbine  | In             |
| 20                   | A2       | GTurbine  | In             |
| GT7                  | F7       | GTurbine  | Out            |
| Oxy2                 | O2       | Claus     | In             |
| Sour1                | L4       | Claus     | In             |

|           |     |       |     |
|-----------|-----|-------|-----|
| Sour2     | L5  | Claus | In  |
| Acid1     | G1  | Claus | In  |
| Makeupw   | L11 | Claus | In  |
| H2        | F6b | Claus | In  |
| S-out     | L12 | Claus | Out |
| Tail5     | F5  | Claus | Out |
| Toslurryw | L1  | Claus | Out |
| Tosump    | L2  | Claus | Out |
| Toscrub   | L3  | Claus | Out |
| Flue      | F7  | Steam | In  |
| Makeup-w  | L9  | Steam | In  |
| Newstack  | F8  | Steam | Out |
| To-shift  | G2  | Steam | Out |
| Waste     | L10 | Steam | Out |
| Ventgas   | G4  | Steam | Out |

Tables 18-22 below gives a more in-depth description of each of the stream categories. A brief description, temperature, pressure, flowrate, enthalpy, entropy, exergy, and composition is presented. The enthalpy and entropy values are from the Aspen model and the exergy values are from our calculations.

Table S20: Breakdown of carbon dioxide streams in the CO<sub>2</sub> Membrane Model

|                                  | C1                                                  | C2                                                  | C3                                     | C4                                           |
|----------------------------------|-----------------------------------------------------|-----------------------------------------------------|----------------------------------------|----------------------------------------------|
| Description                      | Low pressure CO <sub>2</sub> stream exiting Selexol | Mid-pressure CO <sub>2</sub> stream exiting Selexol | CO <sub>2</sub> permeate from membrane | Supercritical CO <sub>2</sub> product stream |
| Temperature [K]                  | 284.85                                              | 292.93                                              | 312                                    | 345.45                                       |
| Pressure [MPa]                   | 0.15                                                | 1.1                                                 | 1.1                                    | 15.3                                         |
| Flowrate [kmol·s <sup>-1</sup> ] | 0.94                                                | 0.10                                                | 2.09                                   | 3.12                                         |
| Enthalpy [MW]                    | -368.64                                             | -36.74                                              | -743.52                                | -1157.93                                     |
| Entropy [kW·K <sup>-1</sup> ]    | -1.85                                               | -1.54                                               | -27.83                                 | -136.63                                      |
| Exergy [MW]                      | 19.38                                               | 4.48                                                | 93.67                                  | 136.0                                        |
| Composition [mol%]               |                                                     |                                                     |                                        |                                              |
| CO                               | 0.02                                                | 0.52                                                | 0.17                                   | 0.14                                         |
| CO <sub>2</sub>                  | 99.38                                               | 89.78                                               | 90.05                                  | 93.20                                        |
| H <sub>2</sub>                   | 0.16                                                | 8.15                                                | 8.96                                   | 6.32                                         |
| H <sub>2</sub> O                 | 0.38                                                | 0.07                                                | 0.5                                    | 0.05                                         |
| N <sub>2</sub>                   | 0.02                                                | 0.8                                                 | 0.12                                   | 0.11                                         |
| Ar                               | 0.04                                                | 0.63                                                | 0.10                                   | 0.11                                         |
| CH <sub>4</sub>                  |                                                     | 0.04                                                |                                        |                                              |
| H <sub>2</sub> S                 |                                                     |                                                     | 0.10                                   | <b>0.07</b>                                  |
| O <sub>2</sub>                   |                                                     | 0.01                                                |                                        |                                              |

Table S21: Breakdown of fuel streams in the CO<sub>2</sub> Membrane Model

|                                  | F1                       | F2                                | F3                     | F4                             | F5            | F6             |
|----------------------------------|--------------------------|-----------------------------------|------------------------|--------------------------------|---------------|----------------|
| Description                      | Raw gas exiting Gasifier | Scrubbed gas exiting the Scrubber | Syngas exiting the WGS | Retentate exiting the membrane | Claus Recycle | Cleaned syngas |
| Temperature [K]                  | 489.10                   | 484.07                            | 423                    | 312                            | 308           | 288.31         |
| Pressure [MPa]                   | 5.5                      | 5.5                               | 5.43                   | 5.43                           | 5.35          | 5.2            |
| Flowrate [kmol·s <sup>-1</sup> ] | 9.46                     | 8.72                              | 10.40                  | 5.68                           | 0.08          | 4.77           |

|                                  |                            |                               |           |           |                                     |         |
|----------------------------------|----------------------------|-------------------------------|-----------|-----------|-------------------------------------|---------|
| Enthalpy [MW]                    | -1507.27                   | -1329.80                      | -1912.88  | -503.95   | -26.20                              | -104.39 |
| Entropy [kW·K <sup>-1</sup> ]    | -24.39                     | 16.31                         | -375.46   | -136.01   | -2.24                               | -132.70 |
| Exergy [MW]                      | 1312.79                    | 1298.90                       | 1249.85   | 1116.96   | 4.36                                | 1053.89 |
| Composition [mol%]               |                            |                               |           |           |                                     |         |
| CO                               | 26.89                      | 29.19                         | 0.82      | 1.44      | 0.02                                | 1.7     |
| CO <sub>2</sub>                  | 7.26                       | 7.87                          | 30.26     | 22.08     | 85.66                               | 5.01    |
| H <sub>2</sub>                   | 20.31                      | 22.05                         | 42.11     | 73.74     | 1.04                                | 87.72   |
| H <sub>2</sub> O                 | 43.88                      | 39.09                         | 25.28     | 0.07      | 0.20                                | 0.01    |
| N <sub>2</sub>                   | 0.61                       | 0.66                          | 0.56      | 0.98      | 8.17                                | 4.46    |
| Ar                               | 0.55                       | 0.60                          | 0.50      | 0.88      | 1.30                                | 1.05    |
| CH <sub>4</sub>                  | 0.01                       | 0.01                          | 0.01      | 0.02      | 1.52                                | 0.04    |
| H <sub>2</sub> S                 | 0.49                       | 0.53                          | 0.46      | 0.81      | 2.09                                |         |
| O <sub>2</sub>                   |                            |                               |           |           |                                     | 0.01    |
|                                  | <b>F6A</b>                 | <b>F6b</b>                    | <b>F7</b> | <b>F8</b> | <b>F9</b>                           |         |
| Description                      | Cleaned syngas entering GT | Cleaned syngas entering Claus | Flue gas  | Stack gas | Cooled syngas entering the membrane |         |
| Temperature [K]                  | 292.18                     | 292.18                        | 834.54    | 409.15    | 312                                 |         |
| Pressure [MPa]                   | 5.2                        | 5.2                           | 0.10      | 0.10      | 5.43                                |         |
| Flowrate [kmol·s <sup>-1</sup> ] | 4.76                       | 0.01                          | 37.10     | 37.10     | 7.78                                |         |
| Enthalpy [MW]                    | -104.22                    | -0.17                         | -603.18   | -1110.72  | -1247.98                            |         |
| Entropy [kW·K <sup>-1</sup> ]    | -131.59                    | -0.22                         | 1215.39   | 379.26    | -179.88                             |         |
| Exergy [MW]                      | 1052.12                    | 1.75                          | 281.58    | 31.32     | 1214.57                             |         |
| Composition [mol%]               |                            |                               |           |           |                                     |         |
| CO                               | 1.7                        | 1.7                           |           |           | 1.10                                |         |
| CO <sub>2</sub>                  | 5.01                       | 5.01                          | 0.89      | 0.89      | 40.35                               |         |
| H <sub>2</sub>                   | 87.72                      | 87.72                         |           |           | 56.32                               |         |
| H <sub>2</sub> O (g)             | 0.01                       | 0.01                          | 12.16     | 12.16     | 0.18                                |         |
| N <sub>2</sub>                   | 4.46                       | 4.46                          | 74.50     | 74.50     | 0.75                                |         |
| Ar                               | 1.05                       | 1.05                          | 0.94      | 0.94      | 0.67                                |         |
| CH <sub>4</sub>                  | 0.04                       | 0.04                          |           |           | 0.01                                |         |
| H <sub>2</sub> S                 |                            |                               |           |           | 0.62                                |         |
| O <sub>2</sub>                   | 0.01                       | 0.01                          | 11.51     | 11.51     |                                     |         |

Table S22: Breakdown of gas streams in the CO<sub>2</sub> Membrane Model

|                                  | <b>G1</b>                                | <b>G2</b>                                         | <b>G3</b>            | <b>G4</b>              |
|----------------------------------|------------------------------------------|---------------------------------------------------|----------------------|------------------------|
| Description                      | Stream entering Claus for sulfur removal | Water vapor exiting Steam cycle to be used in WGS | Vent gas exiting ASU | Vent gas exiting Steam |
| Temperature [K]                  | 322                                      | 597                                               | 300.19               | 406.38                 |
| Pressure [MPa]                   | 0.21                                     | 6.03                                              | 0.11                 | 0.30                   |
| Flowrate [kmol·s <sup>-1</sup> ] | 0.12                                     | 1.68                                              | 2.37                 | 0.01                   |
| Enthalpy [MW]                    | -24.50                                   | -394.04                                           | -0.81                | -1.78                  |
| Entropy [kW·K <sup>-1</sup> ]    | 2.51                                     | -97.54                                            | 2.56                 | -0.33                  |
| Exergy [MW]                      | 39.31                                    | 35.53                                             | 1.45                 | 0.09                   |
| Composition [mol%]               |                                          |                                                   |                      |                        |
| CO <sub>2</sub>                  | 48.19                                    |                                                   | 0.1                  |                        |
| H <sub>2</sub> O                 | 5.77                                     | 100                                               |                      | 100                    |
| N <sub>2</sub>                   | 4.68                                     |                                                   | 95.98                |                        |
| Ar                               | 0.05                                     |                                                   | 0.54                 |                        |
| H <sub>2</sub> S                 | 41.00                                    |                                                   |                      |                        |
| O <sub>2</sub>                   | 0.31                                     |                                                   | 3.38                 |                        |

Table S23: Breakdown of liquid streams in the CO<sub>2</sub> Membrane Model

|                                  | <b>L1</b>                      | <b>L2</b>                                        | <b>L3</b>                  | <b>L4</b>                                 | <b>L5</b>               |
|----------------------------------|--------------------------------|--------------------------------------------------|----------------------------|-------------------------------------------|-------------------------|
| Description                      | Water entering Gasifier        | Sump water used in HX in Gasifier                | Scrubber water             | Sour water exiting Scrubber               | Sour water exiting Cool |
| Temperature [K]                  | 333                            | 373                                              | 343                        | 484.07                                    | 370.28                  |
| Pressure [MPa]                   | 6                              | 6                                                | 8.275                      | 5.5                                       | 5.43                    |
| Flowrate [kmol·s <sup>-1</sup> ] | 1.42                           | 2.94                                             | 2.40                       | 3.15                                      | 2.62                    |
| Enthalpy [MW]                    | -403.67                        | -826.6                                           | -682.5                     | -856.14                                   | -736.12                 |
| Entropy [kW·K <sup>-1</sup> ]    | -224.99                        | -438.3                                           | -375.4                     | -397.40                                   | -384.03                 |
| Exergy [MW]                      | 0.33                           | 2.01                                             | 0.86                       | 10.64                                     | 2.56                    |
| Composition [mol%]               |                                |                                                  |                            |                                           |                         |
| CO                               |                                |                                                  |                            | 0.02                                      |                         |
| CO <sub>2</sub>                  |                                |                                                  |                            | 0.02                                      | 0.36                    |
| H <sub>2</sub>                   |                                |                                                  |                            | 0.02                                      | 0.04                    |
| H <sub>2</sub> O                 | 100.0                          | 100.0                                            | 100.0                      | 99.94                                     | 99.58                   |
| H <sub>2</sub> S                 |                                |                                                  |                            |                                           | 0.02                    |
|                                  | <b>L6</b>                      | <b>L7</b>                                        | <b>L8</b>                  | <b>L9</b>                                 | <b>L10</b>              |
| Description                      | Make-up water entering Selexol | Water leaving compressed CO <sub>2</sub> streams | Knockout water exiting ASU | Make-up water entering condenser in Steam | Waste exiting Steam     |
| Temperature [K]                  | 322                            | 303                                              | 302.91                     | 293                                       | 420.82                  |
| Pressure [MPa]                   | 0.21                           | 2.1                                              | 0.101                      | 0.1                                       | 0.45                    |
| Flowrate [kmol·s <sup>-1</sup> ] | 0.002                          | 0.01                                             | 0.09                       | 1.80                                      | 0.11                    |
| Enthalpy [MW]                    | -0.43                          | -2.57                                            | -24.77                     | -515.05                                   | -30.65                  |
| Entropy [kW·K <sup>-1</sup> ]    | -0.24                          | -2.07                                            | -14.34                     | -295.71                                   | 15.17                   |
| Exergy [MW]                      | 9.1e-5                         | 0.0005                                           | 6.66e-5                    | 0.01                                      | 1.38                    |
| Composition [mol%]               |                                |                                                  |                            |                                           |                         |
| H <sub>2</sub> O                 | 100.0                          | 100.0                                            | 100.0                      | 100.0                                     | 100.0                   |
|                                  | <b>L11</b>                     | <b>L12</b>                                       |                            |                                           |                         |
| Description                      | Make-up water added to Claus   | Sulfur product                                   |                            |                                           |                         |
| Temperature [K]                  | 293                            | 458.01                                           |                            |                                           |                         |
| Pressure [MPa]                   | 0.1                            | 0.18                                             |                            |                                           |                         |
| Flowrate [kmol·s <sup>-1</sup> ] | 0.94                           | 0.00624                                          |                            |                                           |                         |
| Enthalpy [MW]                    | -271.72                        | 0.11                                             |                            |                                           |                         |
| Entropy [kW·K <sup>-1</sup> ]    | -159.40                        | 0.70                                             |                            |                                           |                         |
| Exergy [MW]                      | 0.005                          | 28.07                                            |                            |                                           |                         |
| Composition [mol%]               |                                |                                                  |                            |                                           |                         |
| H <sub>2</sub> O                 | 100.0                          | 6.83                                             |                            |                                           |                         |
| S <sub>8</sub>                   |                                | 93.17                                            |                            |                                           |                         |

Table S24: Breakdown of nitrogen streams in the CO<sub>2</sub> Membrane Model

|             | <b>N1</b>                | <b>N2</b>           |
|-------------|--------------------------|---------------------|
| Description | Nitrogen sent to Selexol | Nitrogen sent to GT |



|                                  |       |        |
|----------------------------------|-------|--------|
| Temperature [K]                  | 303   | 469    |
| Pressure [MPa]                   | 3.17  | 3.17   |
| Flowrate [kmol·s <sup>-1</sup> ] | 0.16  | 3.73   |
| Enthalpy [MW]                    | -0.01 | 18.49  |
| Entropy [kW·K <sup>-1</sup> ]    | -4.49 | -56.57 |
| Exergy [MW]                      | 1.45  | 38.1   |
| Composition [mol%]               |       |        |
| N <sub>2</sub>                   | 99.23 | 99.24  |
| Ar                               | 0.24  | 0.24   |
| O <sub>2</sub>                   | 0.53  | 0.52   |

Figure S3 breaks down each subsystem analyzed in the CO<sub>2</sub> Membrane Model, showing all entering and exiting material, heat and work streams. Included also is the irreversible entropy production, calculated from Aspen values, and the exergy and normalized exergy destruction, from our calculations.

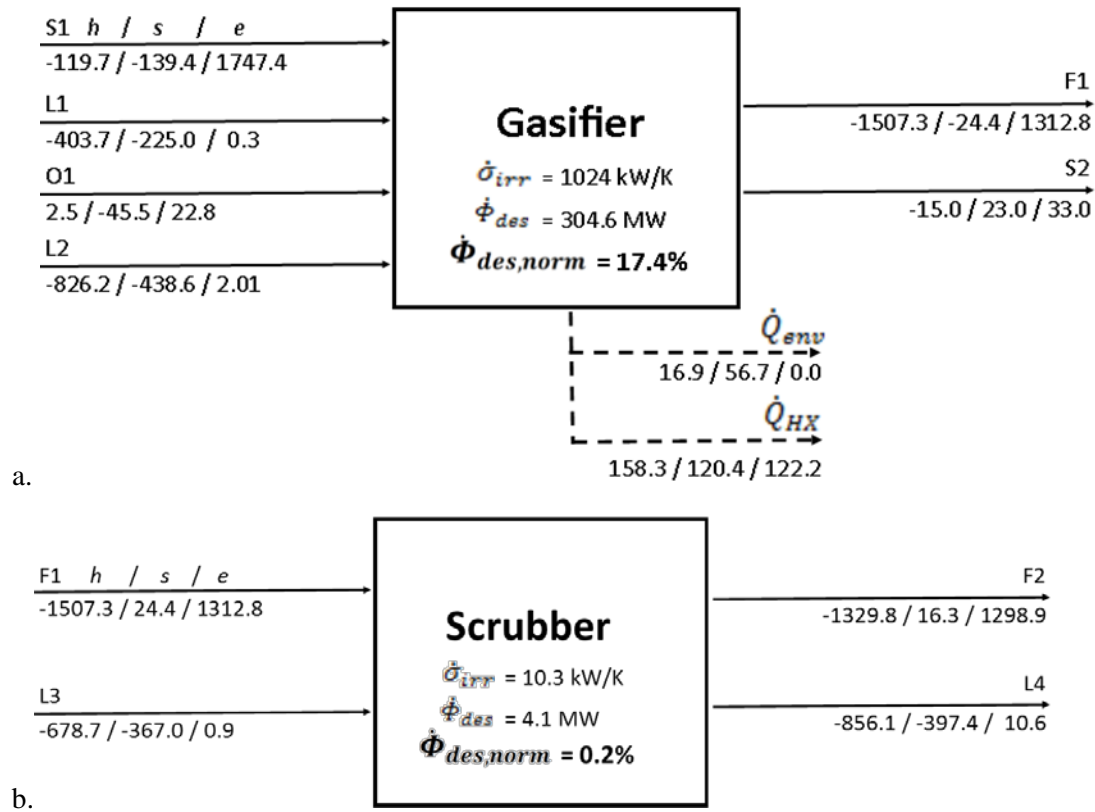

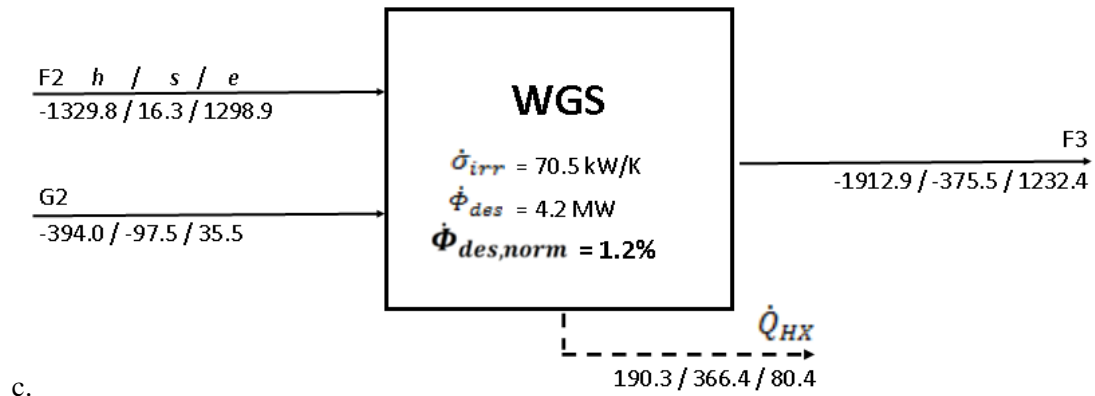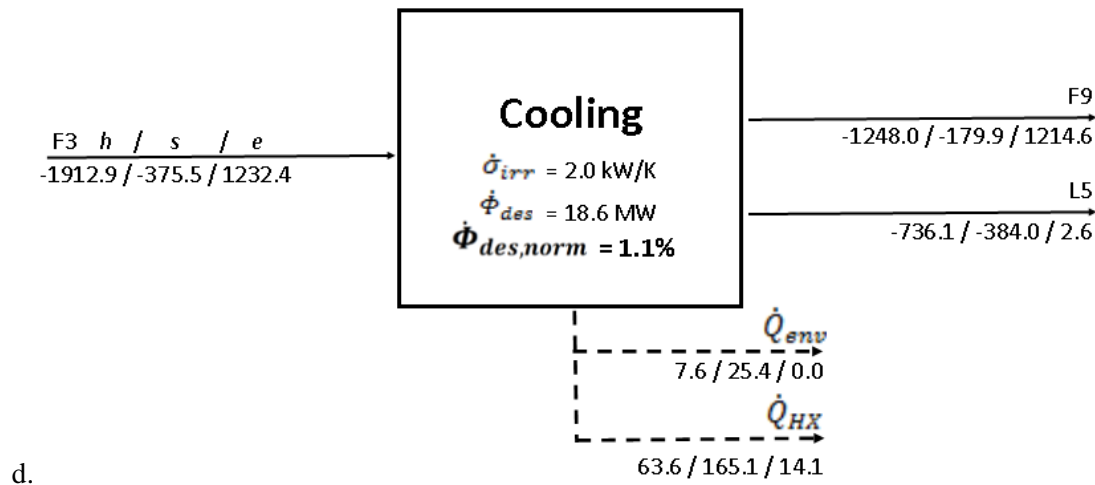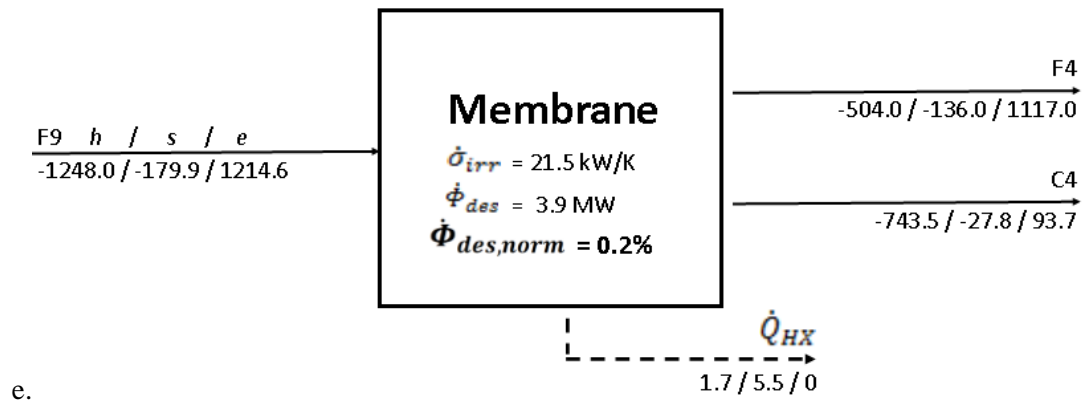

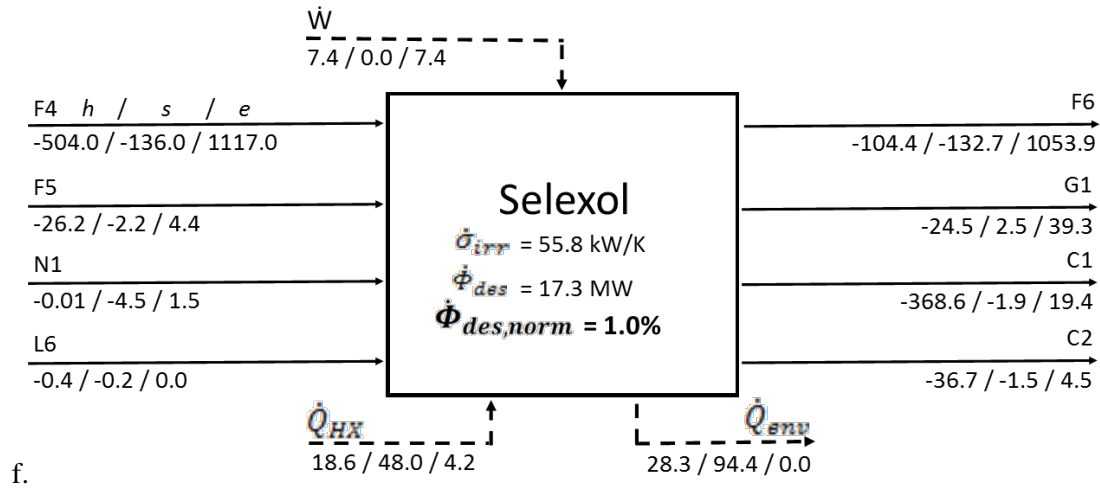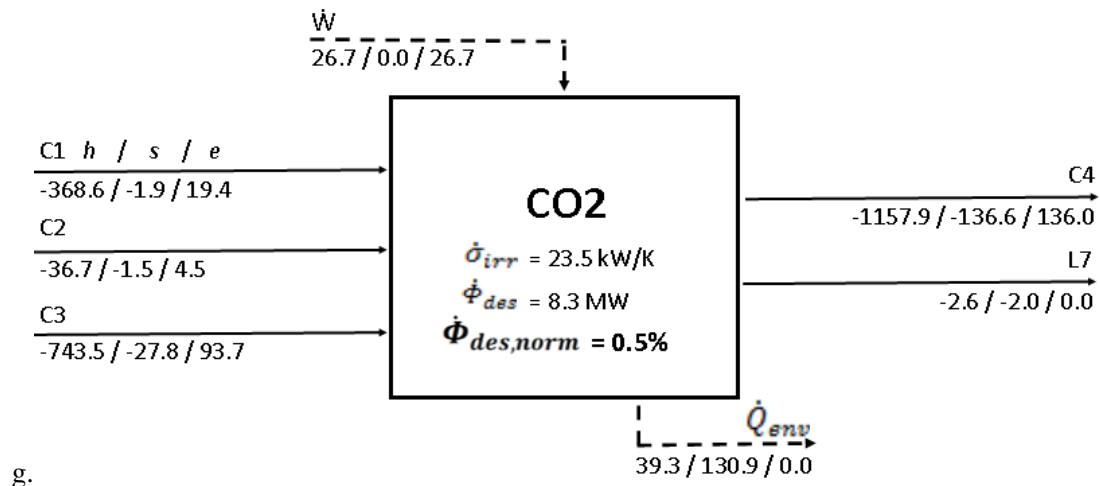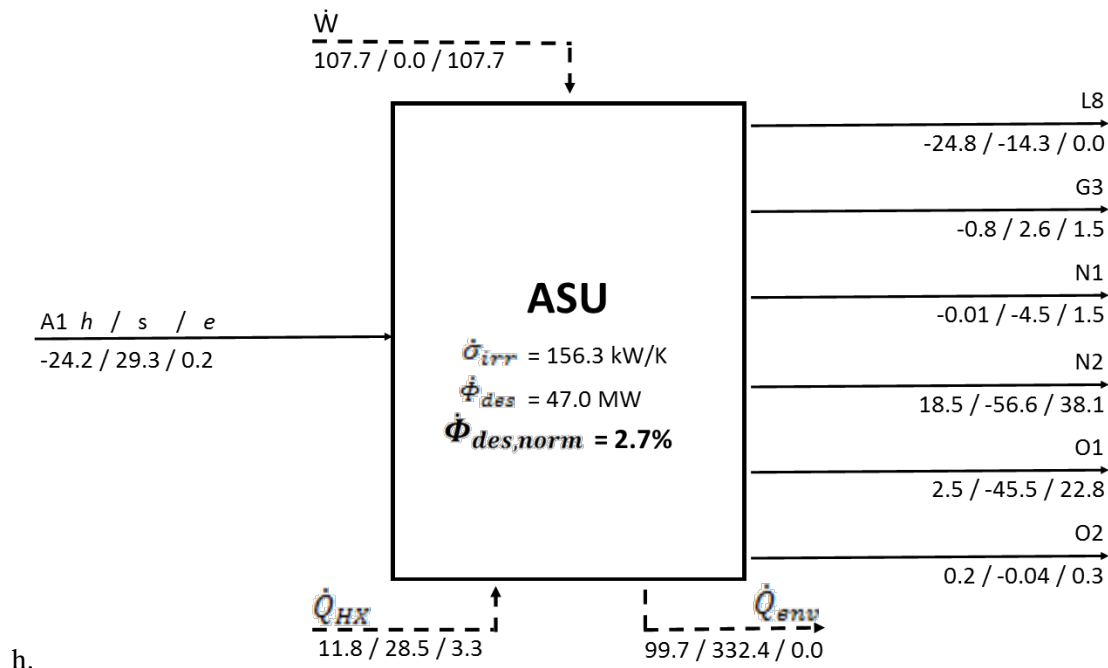

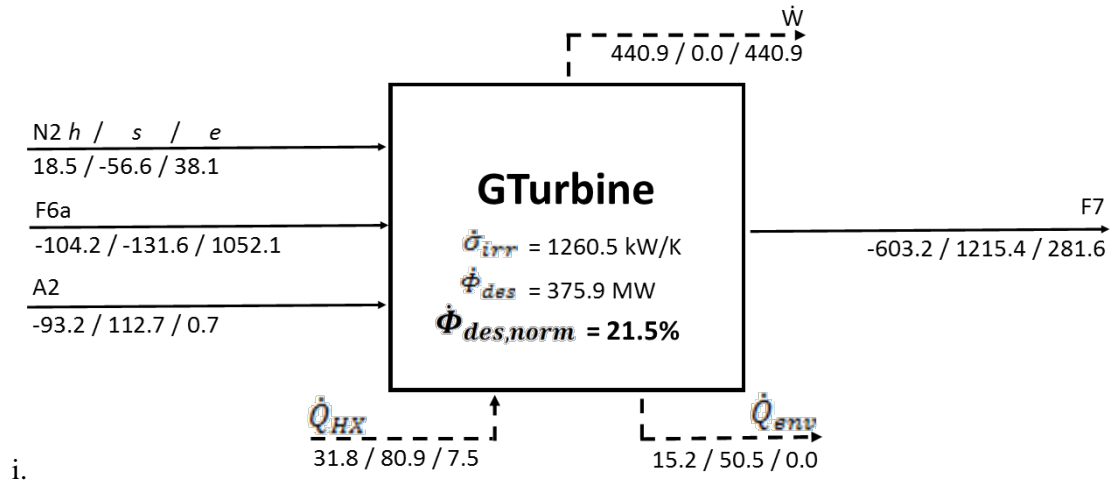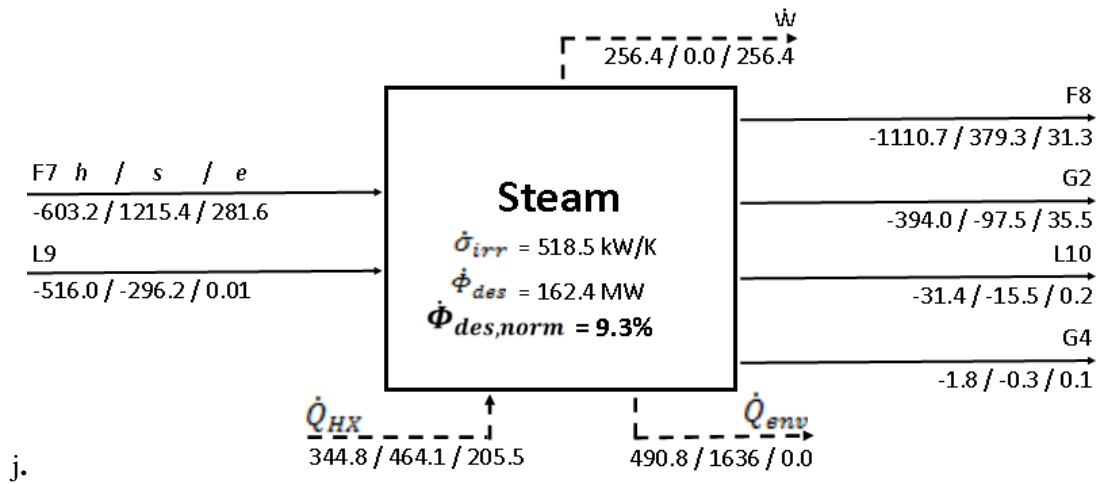

Supplement: s1 [file s1]
